# Supplementary material for: Stabilization of the SARS-CoV-2 Spike Receptor-Binding Domain Using Deep Mutational Scanning and Structure-Based Design
Source: PubMed Central journal article supplement (PMC8276696; doi:10.3389/fimmu.2021.710263), 2021-06-29

# Supplementary Information 4

## Supplementary Shelf-life Stability Data

# SDS-PAGE for RBD-I53-50 nanoparticle

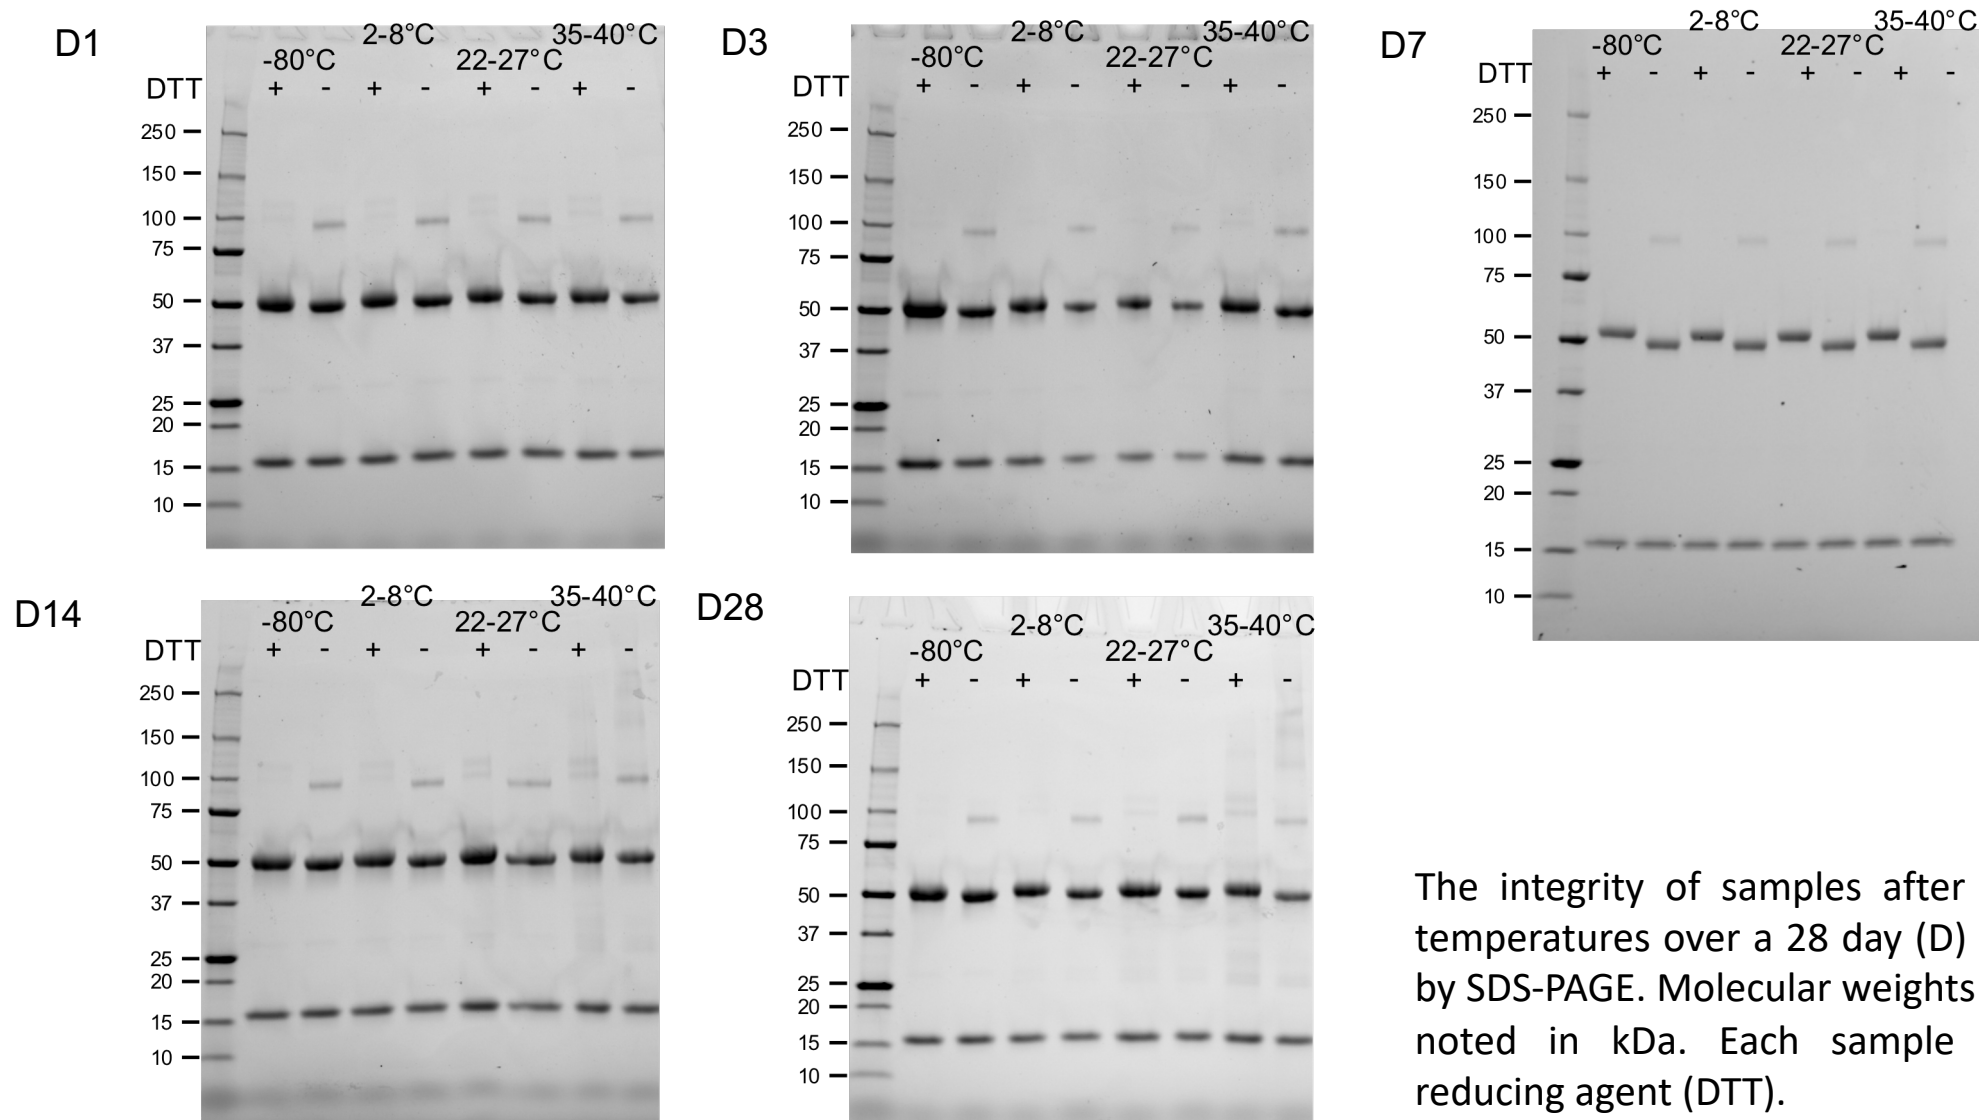

The integrity of samples after incubation at four temperatures over a 28 day (D) study was analyzed by SDS-PAGE. Molecular weights of the standard are noted in kDa. Each sample was analyzed +/- reducing agent (DTT).

# hACE2-Fc binding for RBD-I53-50 nanoparticle

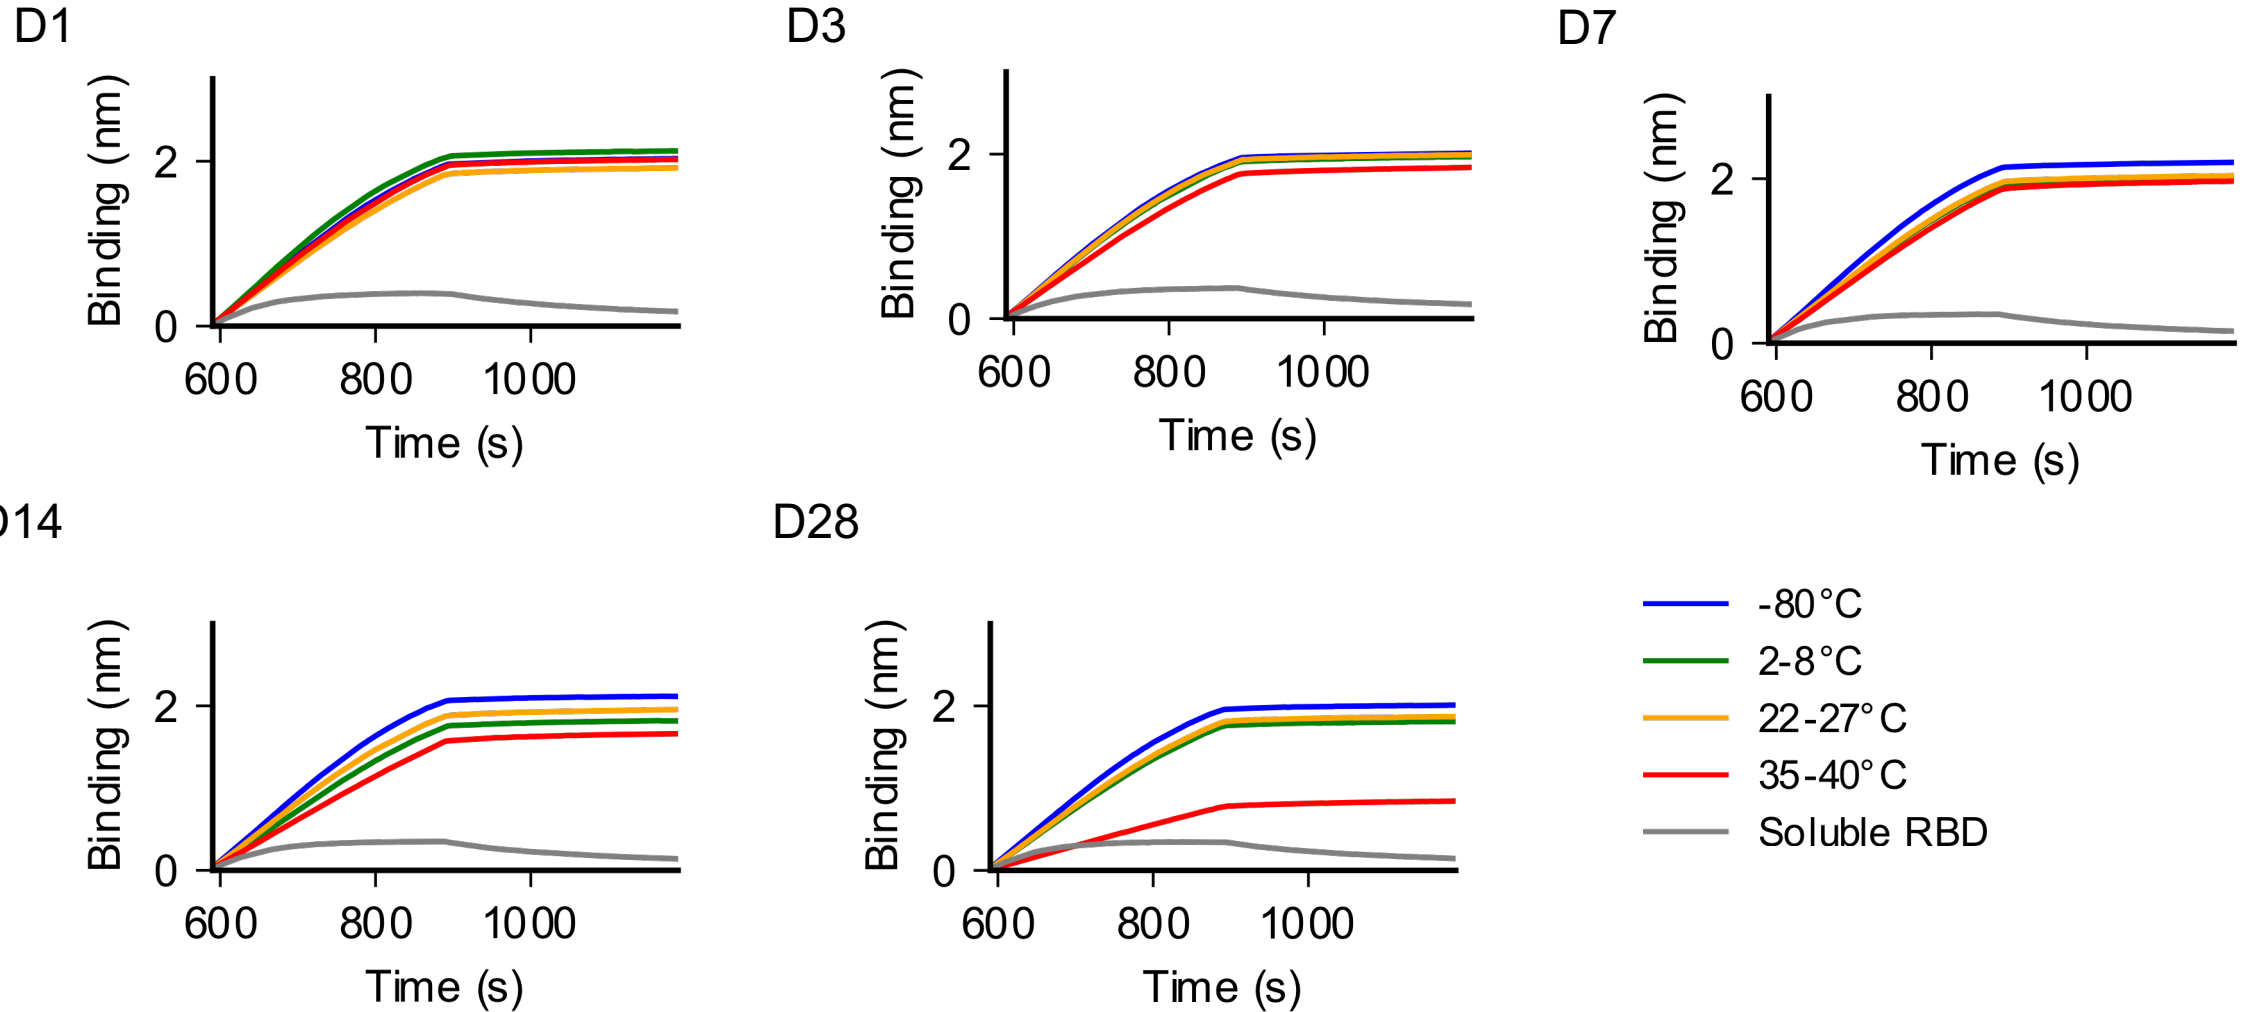

hACE2-Fc binding of antigen incubated at four different temperatures for 28 days (D) was analyzed by bio-layer Interferometry (BLI). Protein A biosensors loaded with hACE2-Fc were incubated with immunogen (association,  $x = 590-889$  s) and then buffer (dissociation,  $x = 890-1190$  s).

# CR3022 binding for RBD-I53-50 nanoparticle

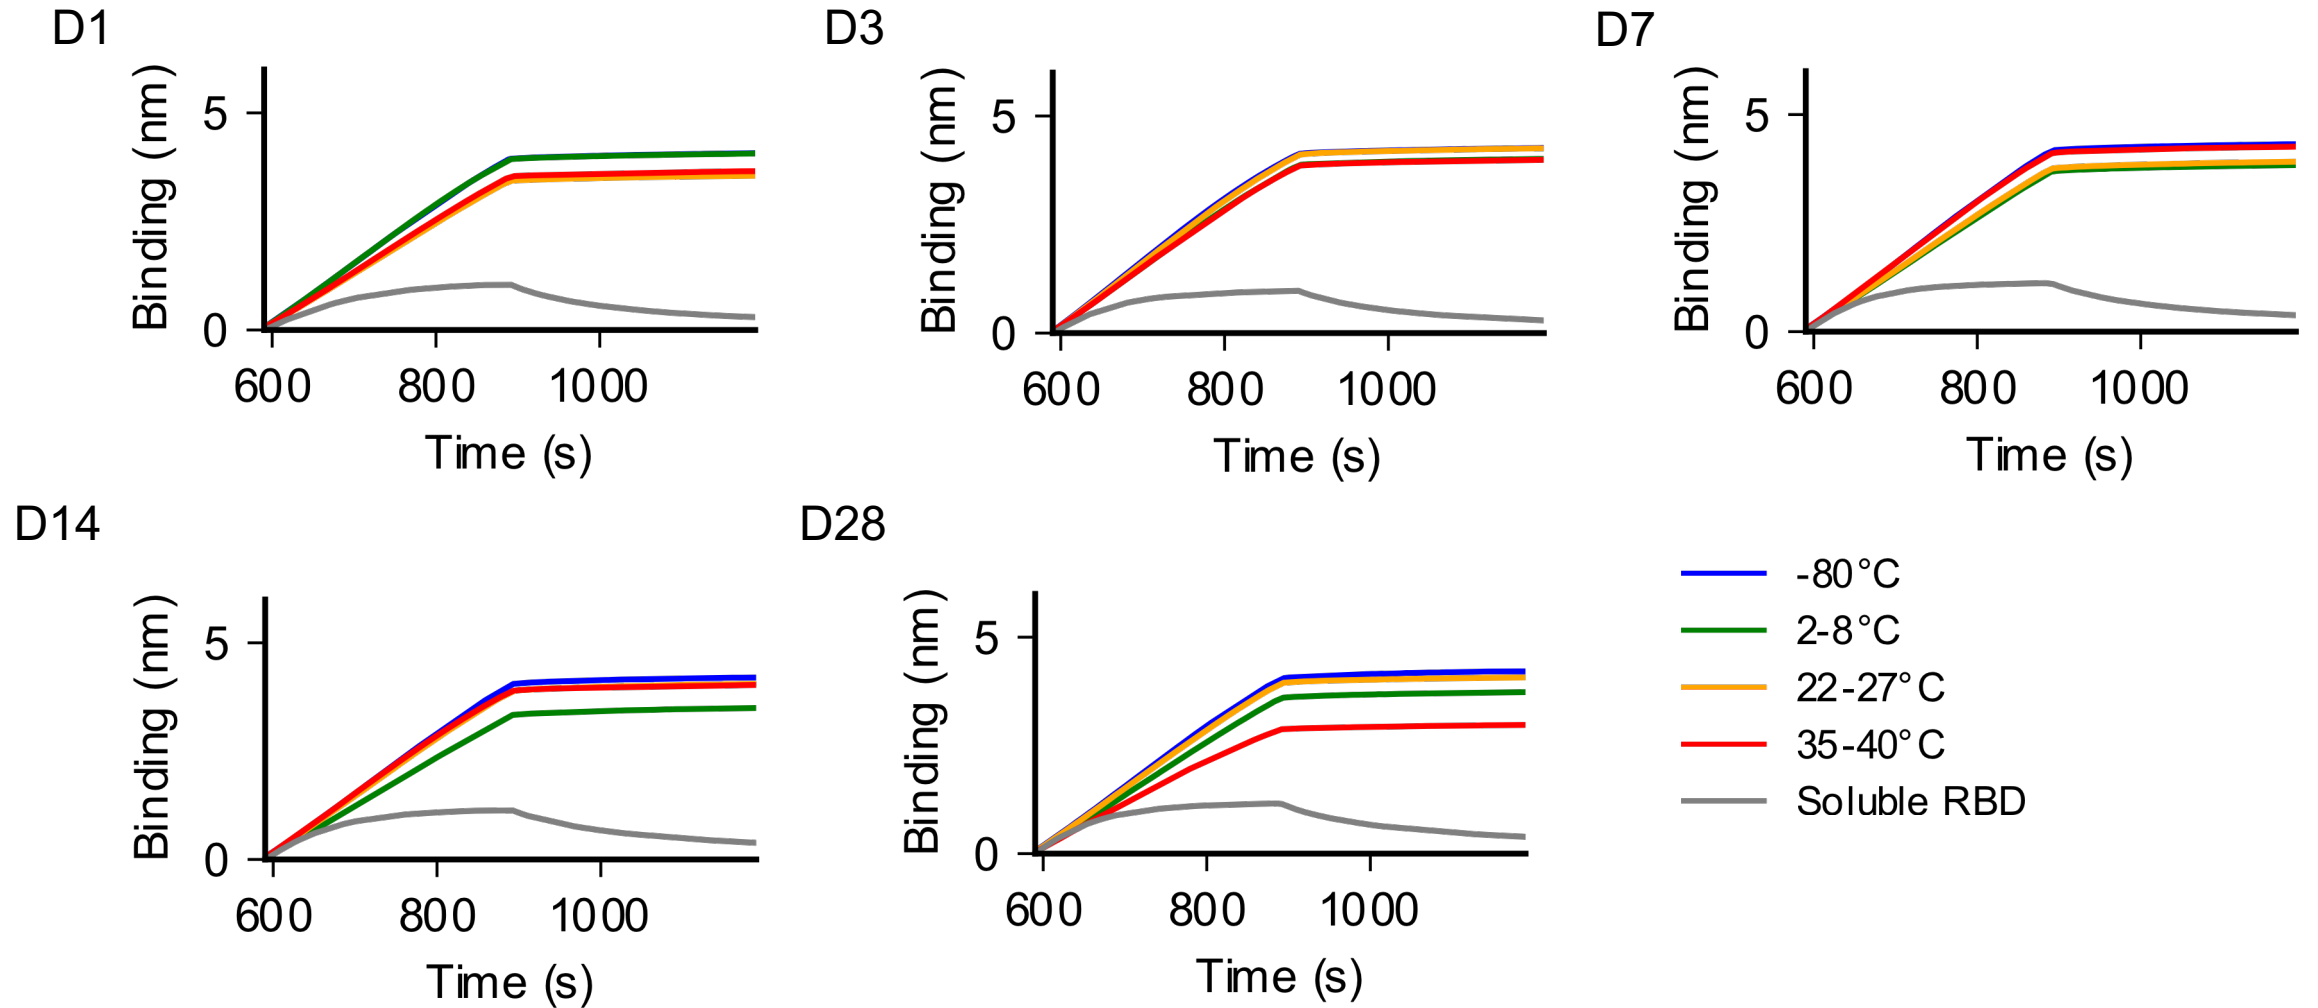

CR3022 IgG binding of antigen incubated at four different temperatures for 28 days (D) was analyzed by bio-layer Interferometry (BLI). Protein A biosensors loaded with CR3022 were incubated with immunogen (association,  $x = 590-889$  s) and then buffer (dissociation,  $x = 890-1190$  s).

# nsEM for RBD-I53-50 nanoparticle

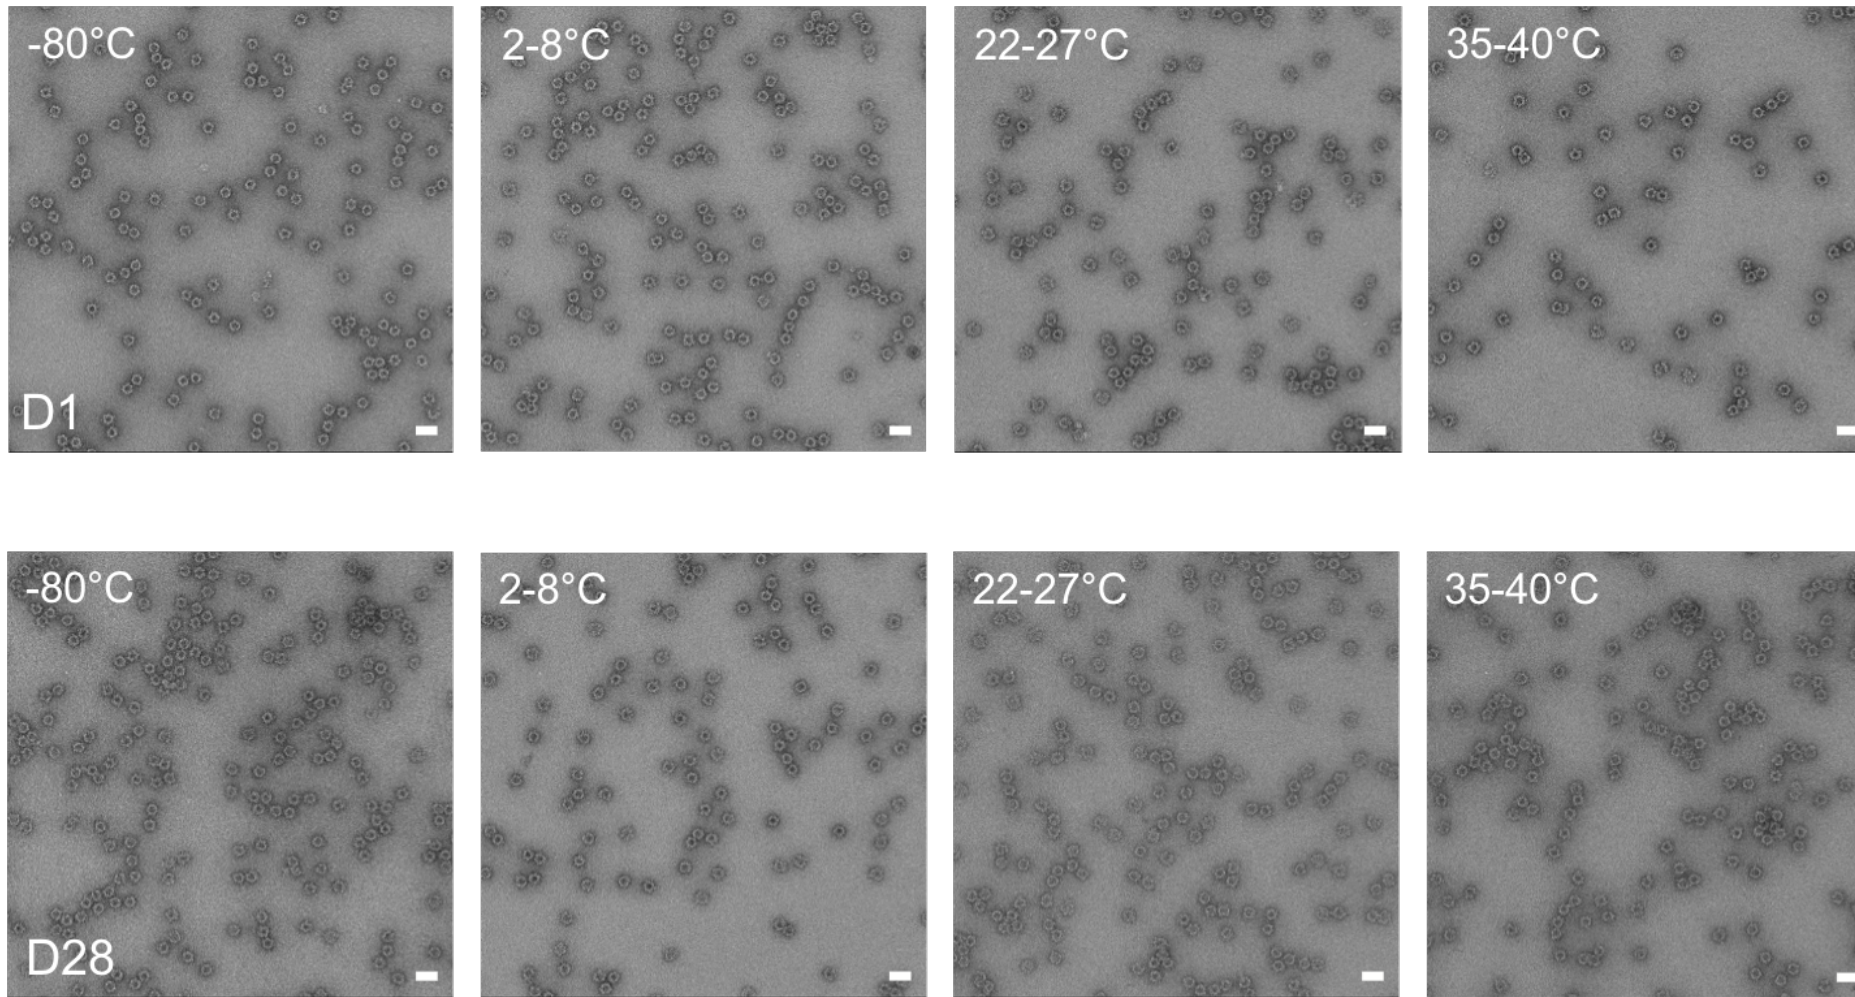

Representative negative stain electron micrographs for each sample at days (D) 1 and 28 following incubation at four temperatures. Scale bar, 50 nm.

# Dynamic light scattering for RBD-I53-50 nanoparticle

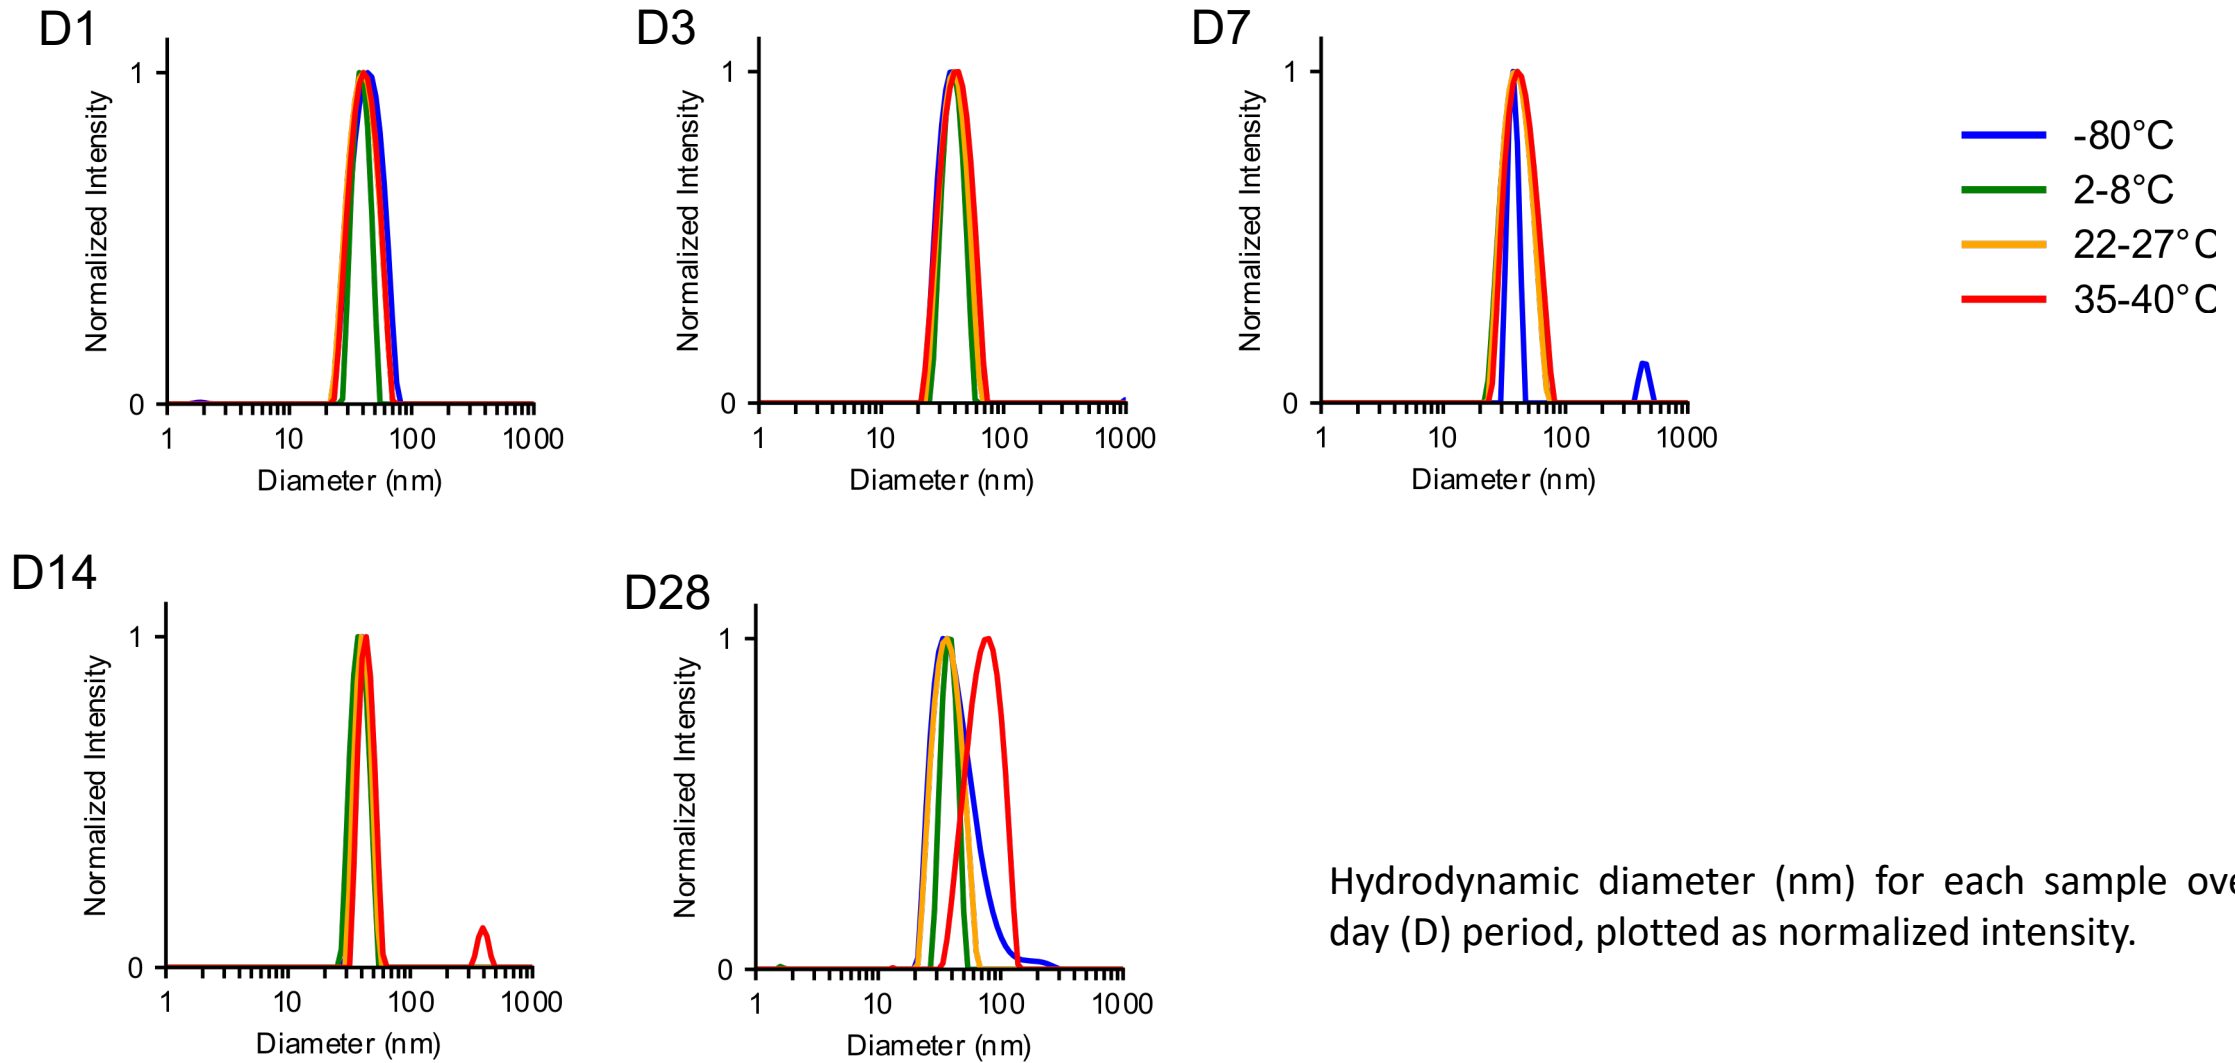

Hydrodynamic diameter (nm) for each sample over a 28 day (D) period, plotted as normalized intensity.

# SDS-PAGE for Rpk4-I53-50 nanoparticle

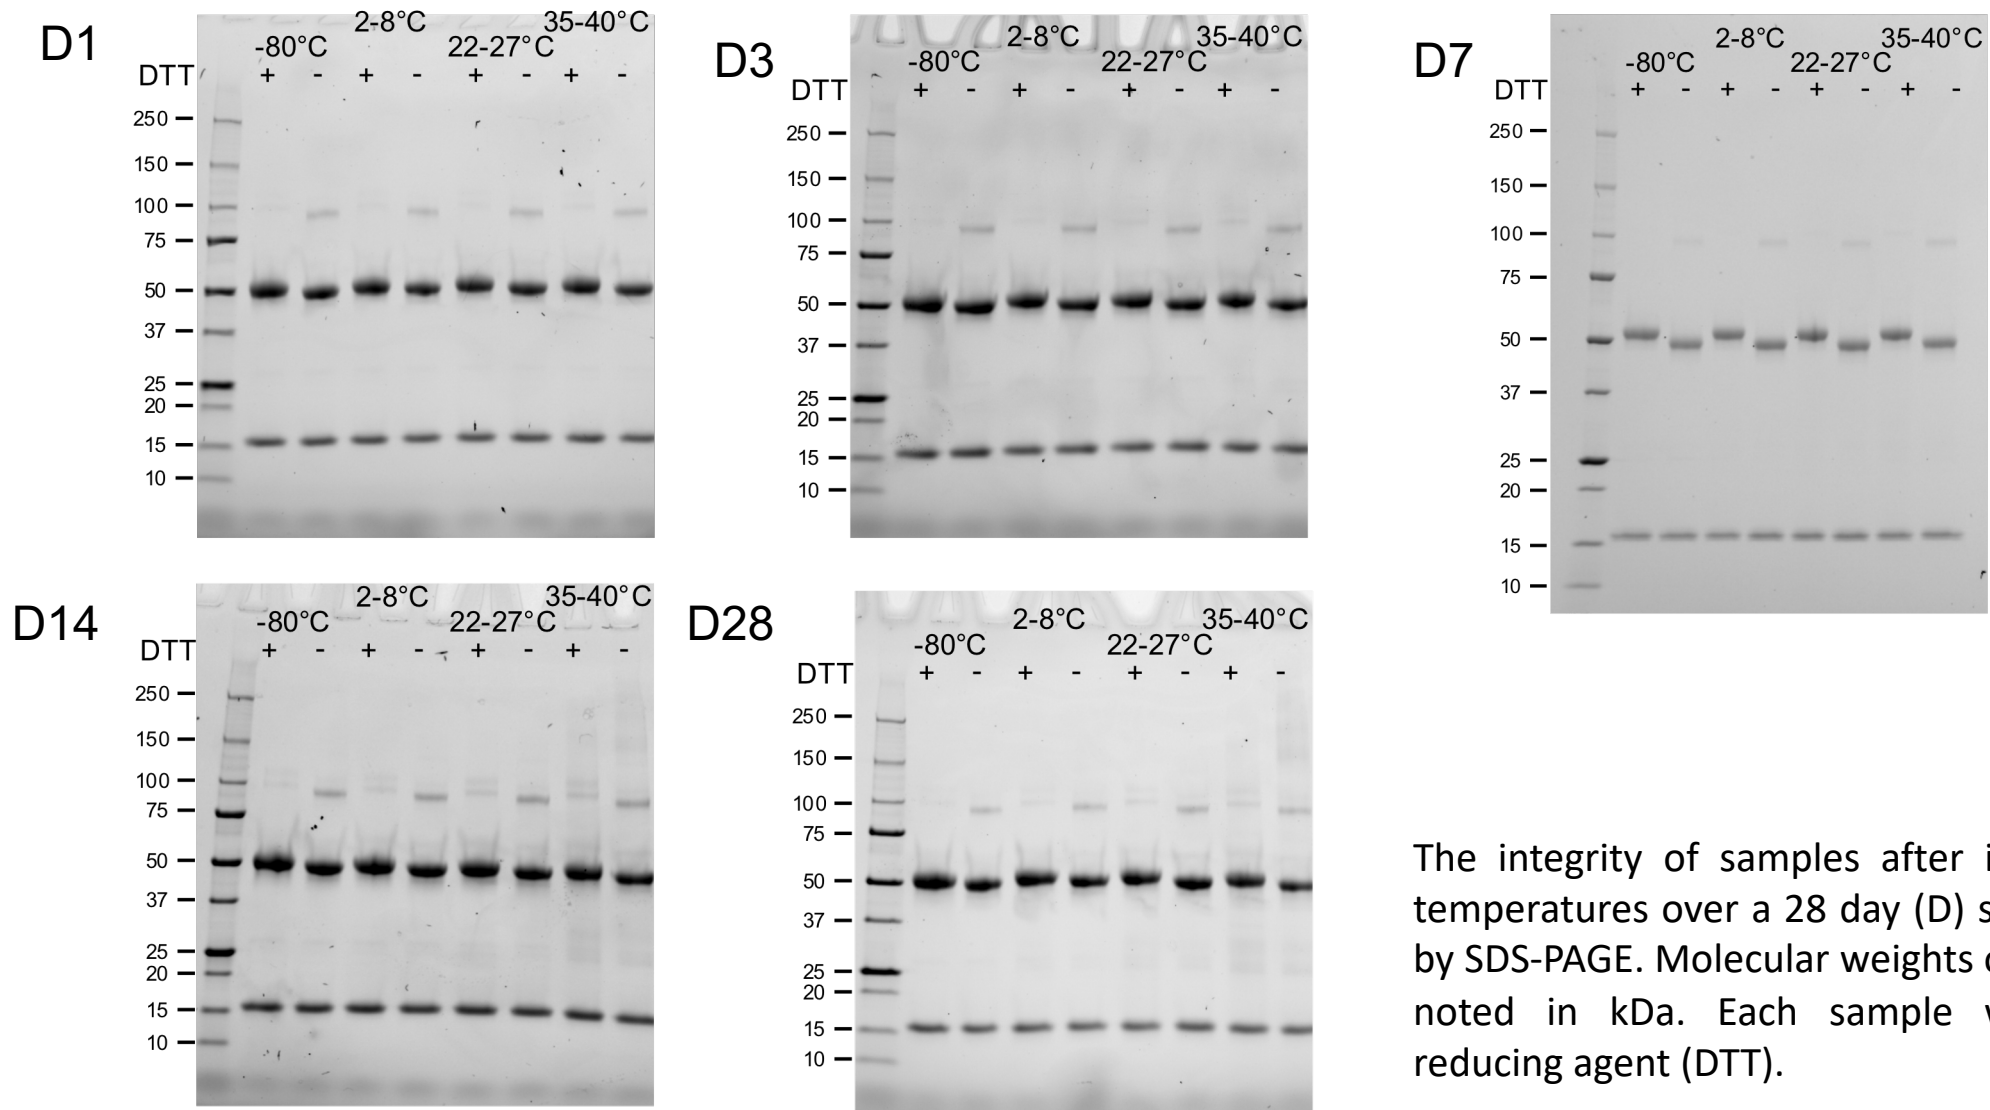

The integrity of samples after incubation at four temperatures over a 28 day (D) study was analyzed by SDS-PAGE. Molecular weights of the standard are noted in kDa. Each sample was analyzed +/- reducing agent (DTT).

# hACE2-Fc binding for Rpk4-I53-50 nanoparticle

D1

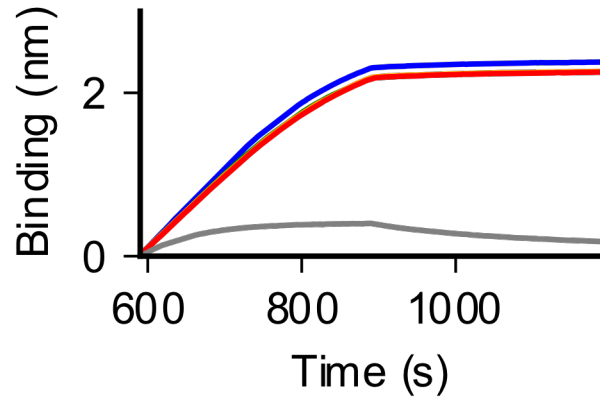

D3

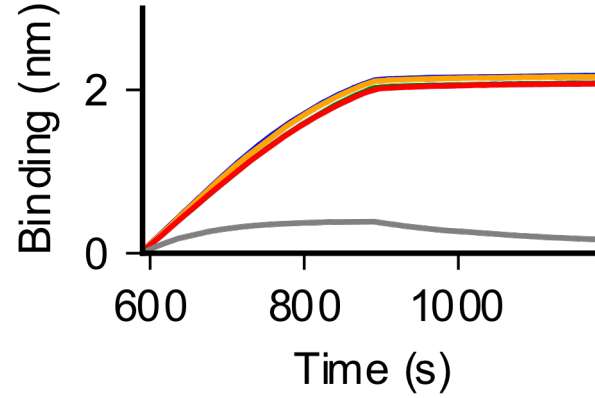

D7

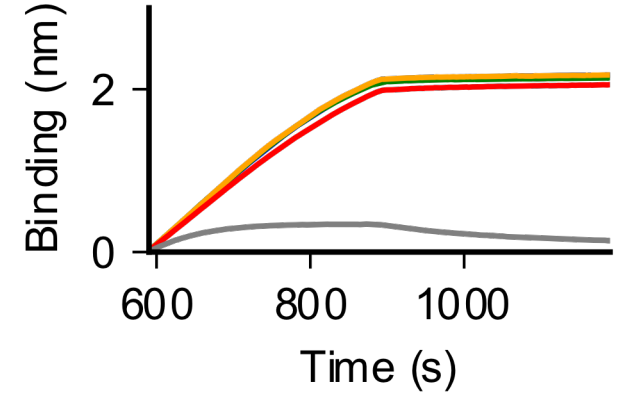

D14

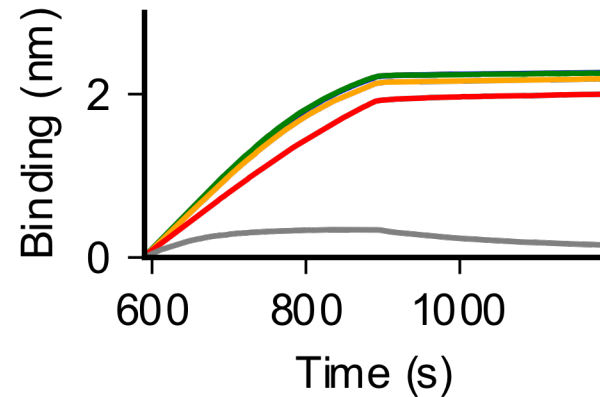

D28

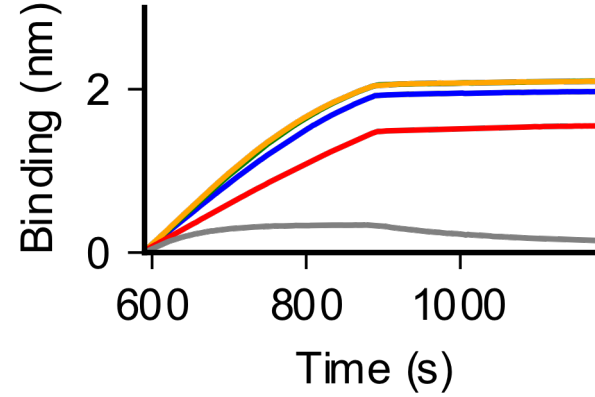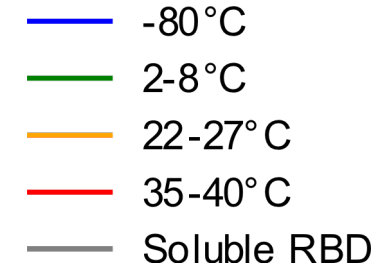

hACE2-Fc binding of antigen incubated at four different temperatures for 28 days (D) was analyzed by bio-layer Interferometry (BLI). Protein A biosensors loaded with hACE2-Fc were incubated with immunogen (association, x = 590–889 s) and then buffer (dissociation, x = 890–1190 s).



# CR3022 binding for Rpk4-I53-50 nanoparticle

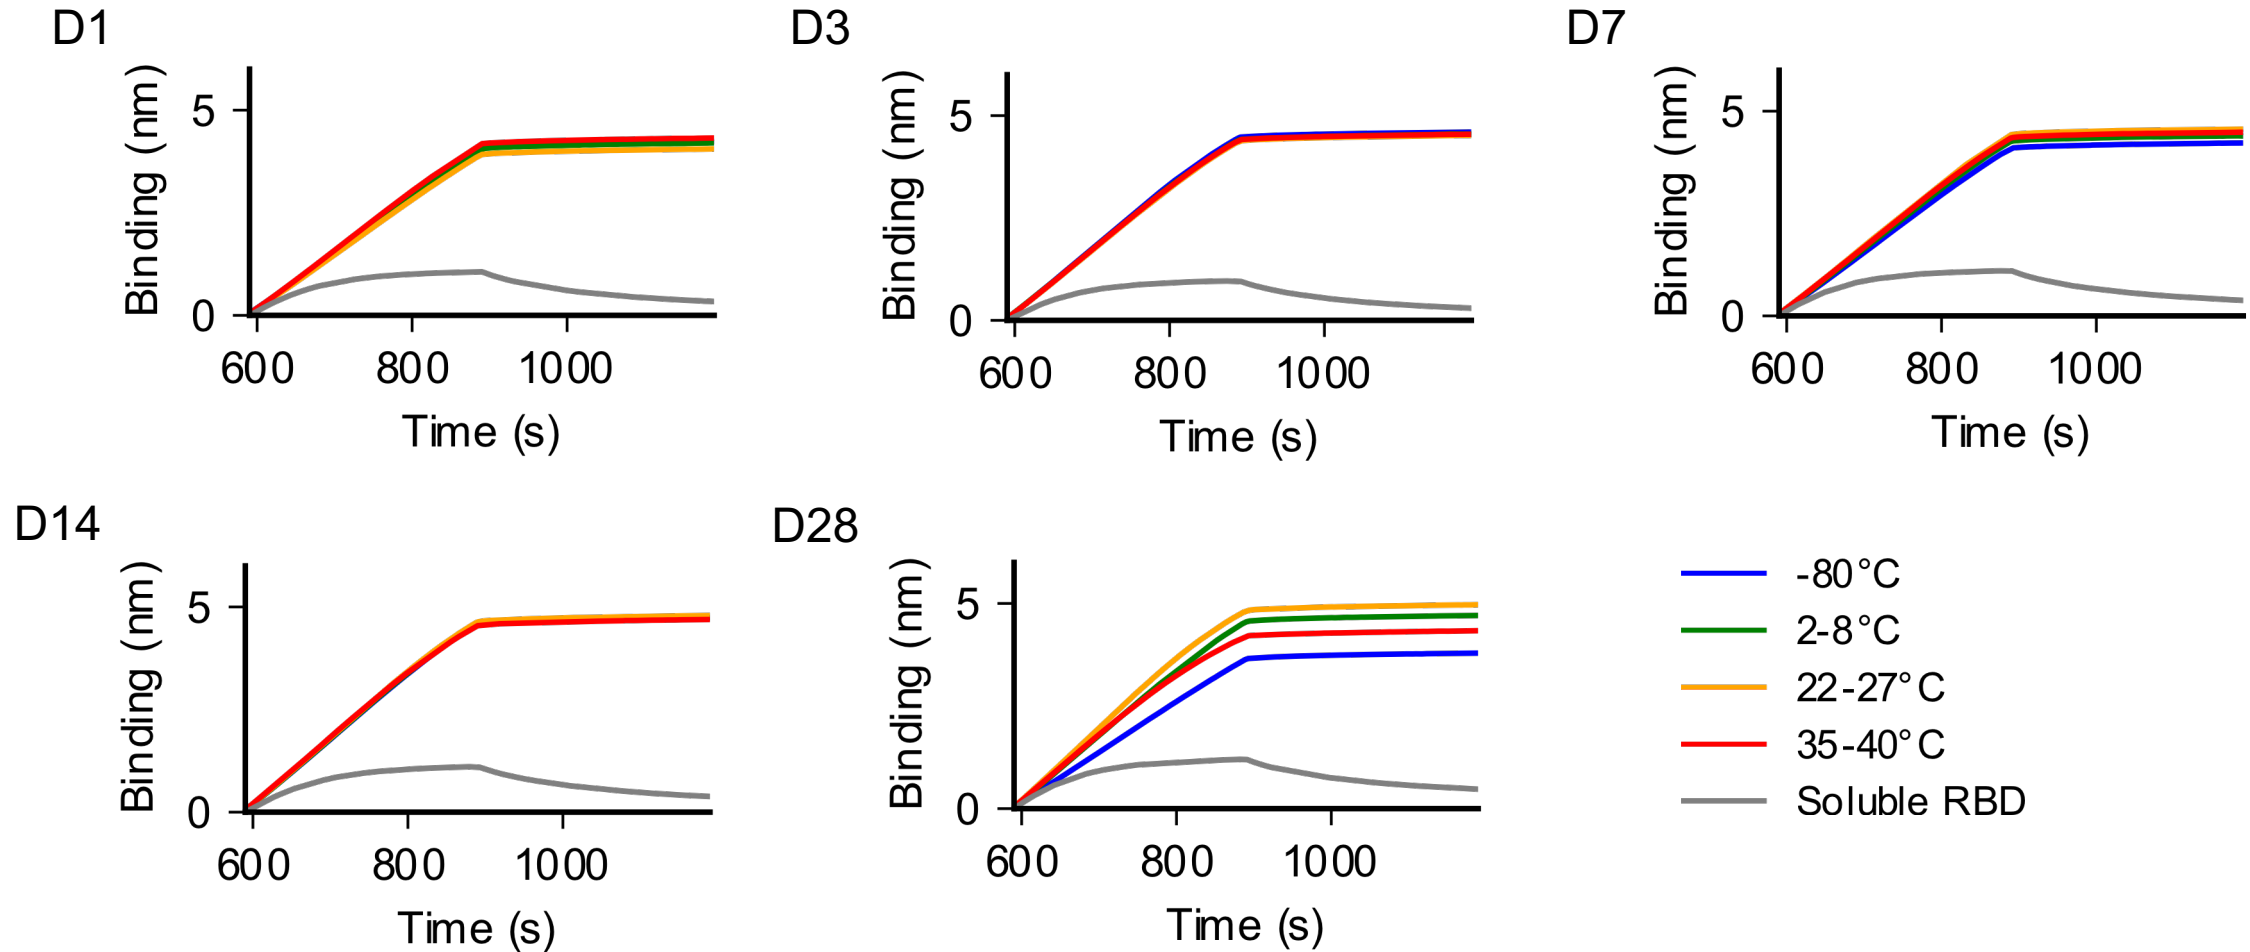

CR3022 IgG binding of antigen incubated at four different temperatures for 28 days (D) was analyzed by bio-layer Interferometry (BLI). Protein A biosensors loaded with CR3022 were incubated with immunogen (association, x = 590–889 s) and then buffer (dissociation, x = 890–1190 s).

# nsEM for Rpk4-I53-50 nanoparticle

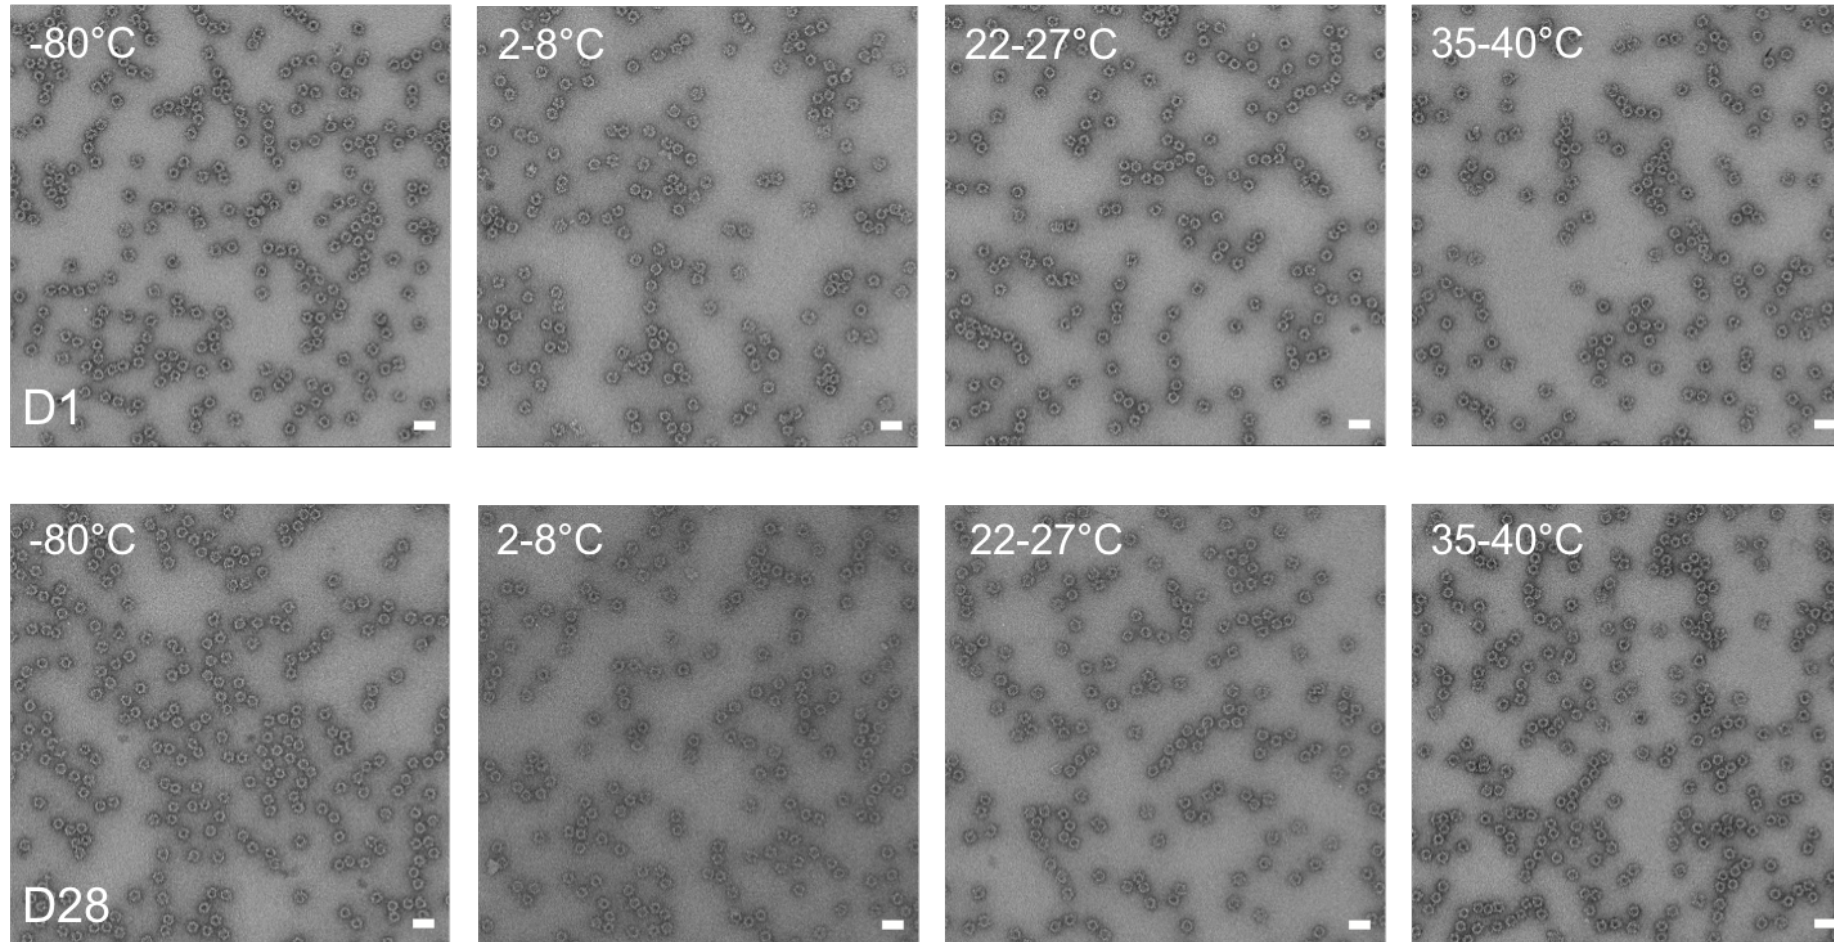

Representative negative stain electron micrographs for each sample at days (D) 1 and 28 following incubation at four temperatures. Scale bar, 50 nm.

# Dynamic light scattering for Rpk4-I53-50 nanoparticle

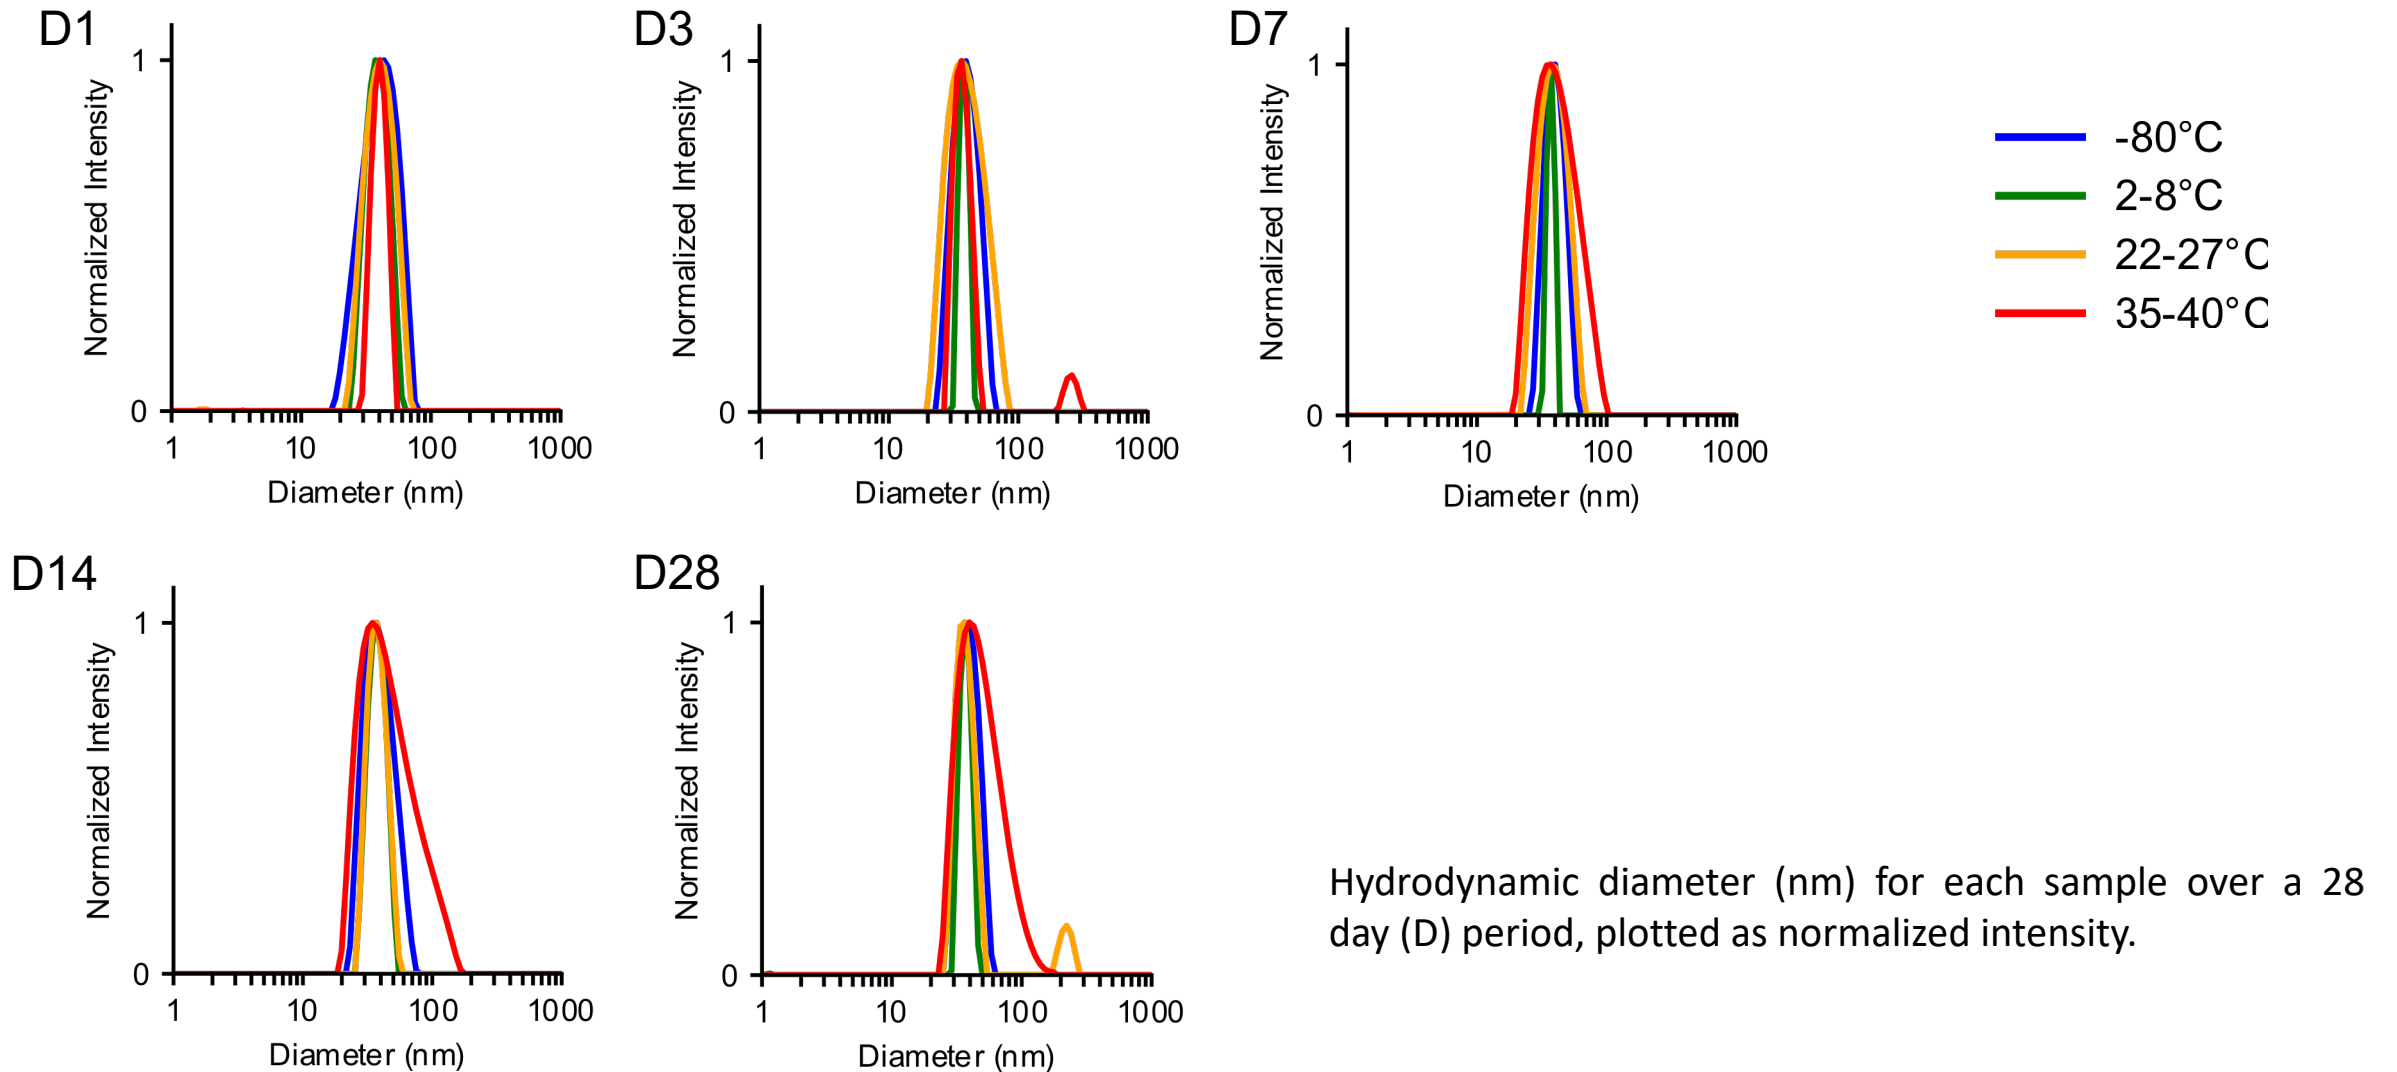

Hydrodynamic diameter (nm) for each sample over a 28 day (D) period, plotted as normalized intensity.

# SDS-PAGE for Rpk9-I53-50 nanoparticle

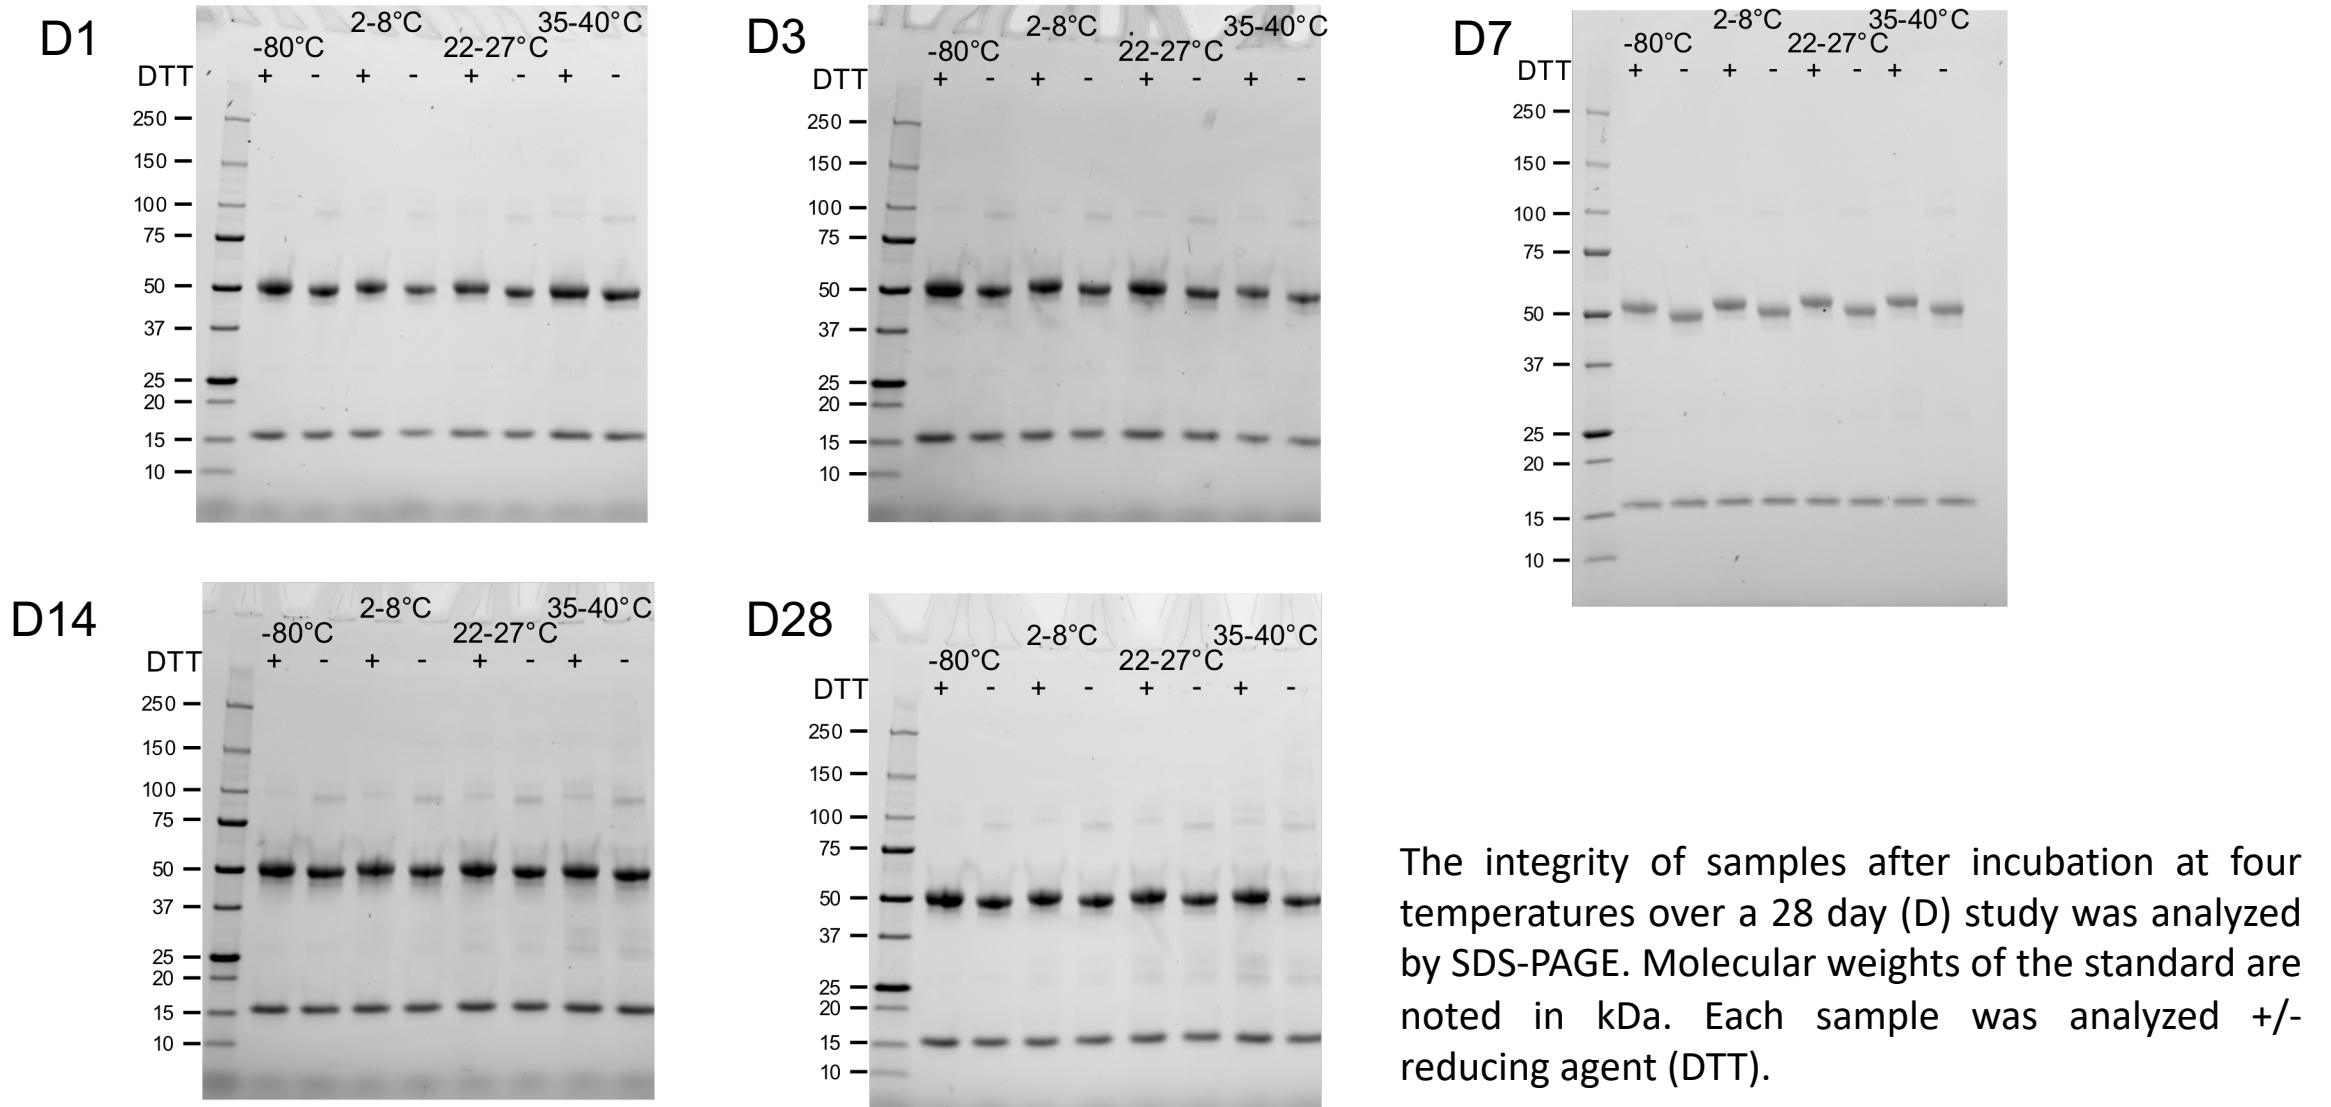

The integrity of samples after incubation at four temperatures over a 28 day (D) study was analyzed by SDS-PAGE. Molecular weights of the standard are noted in kDa. Each sample was analyzed +/- reducing agent (DTT).

# hACE2-Fc binding for Rpk9-I53-50 nanoparticle

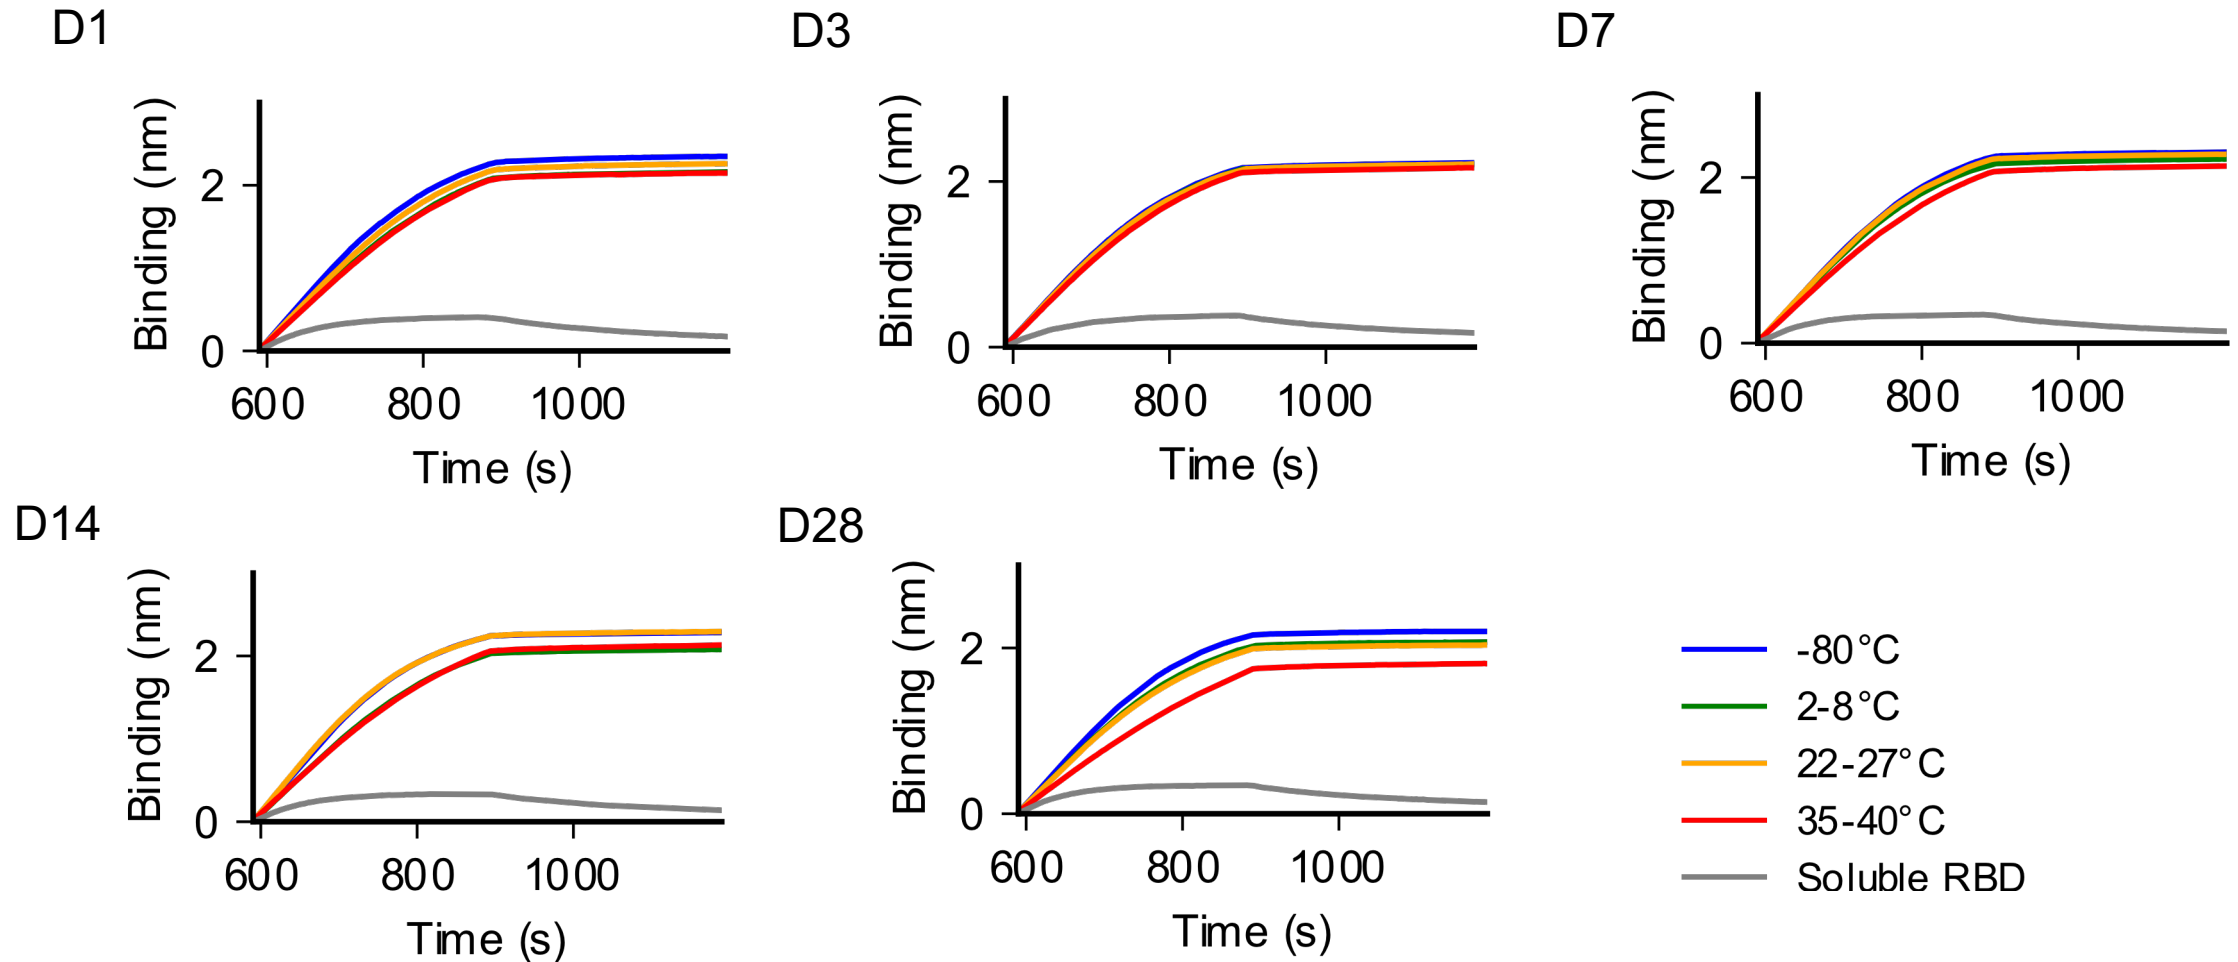

hACE2-Fc binding of antigen incubated at four different temperatures for 28 days (D) was analyzed by bio-layer Interferometry (BLI). Protein A biosensors loaded with hACE2-Fc were incubated with immunogen (association, x = 590–889 s) and then buffer (dissociation, x = 890–1190 s).

# CR3022 binding for Rpk9-I53-50 nanoparticle

D1

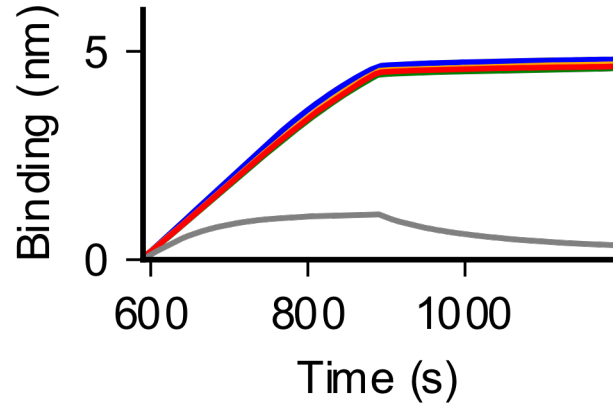

D3

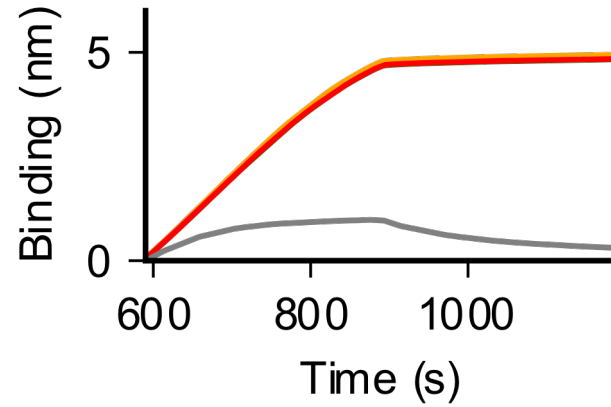

D7

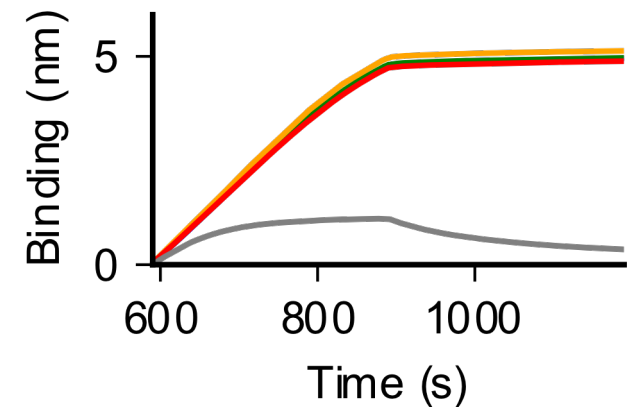

D14

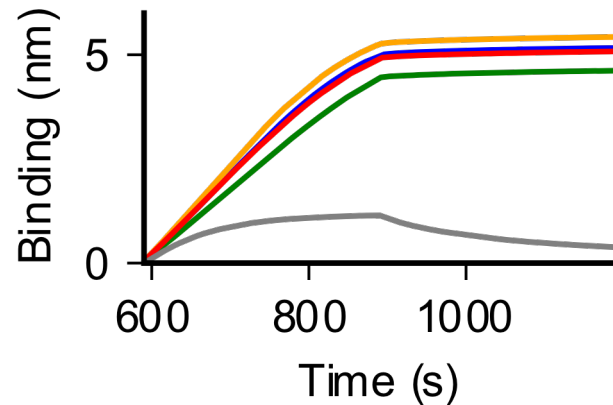

D28

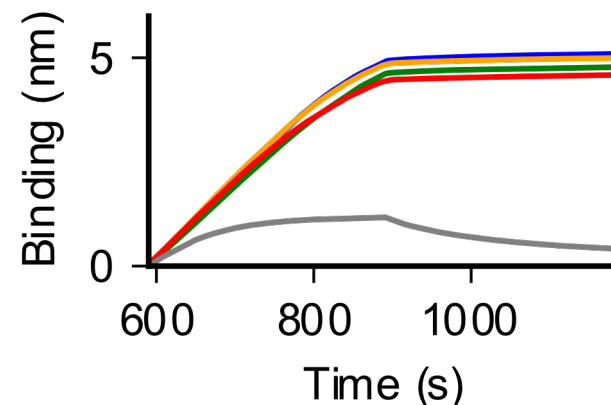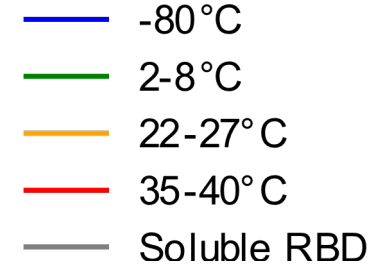

CR3022 IgG binding of antigen incubated at four different temperatures for 28 days (D) was analyzed by bio-layer Interferometry (BLI). Protein A biosensors loaded with CR3022 were incubated with immunogen (association, x = 590–889 s) and then buffer (dissociation, x = 890–1190 s).

# nsEM for Rpk9-I53-50 nanoparticle

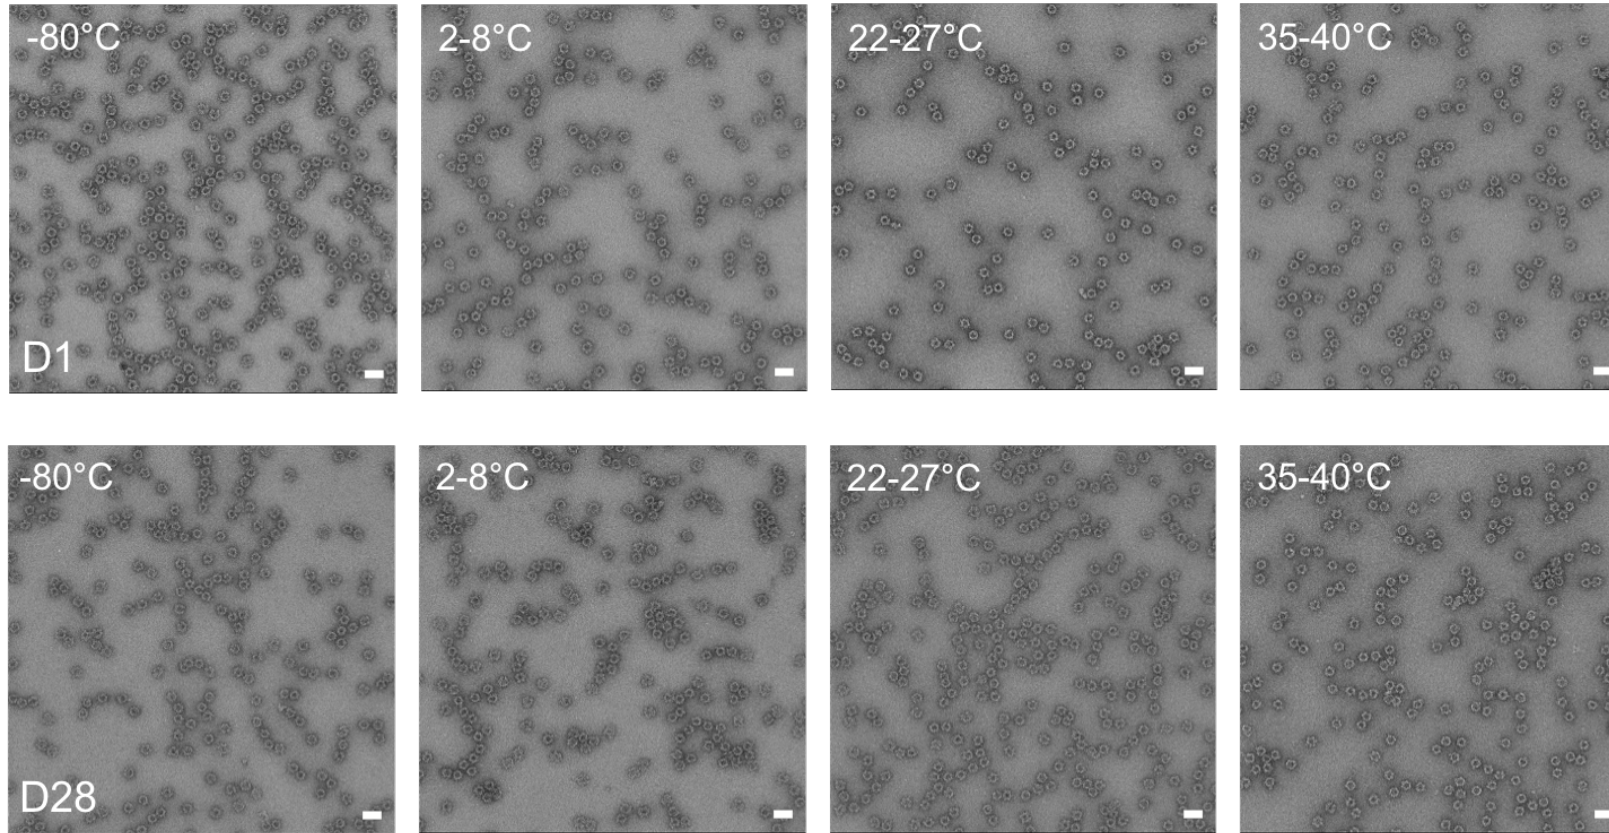

Representative negative stain electron micrographs for each sample at days (D) 1 and 28 following incubation at four temperatures. Scale bar, 50 nm.

# Dynamic light scattering for Rpk9-I53-50 nanoparticle

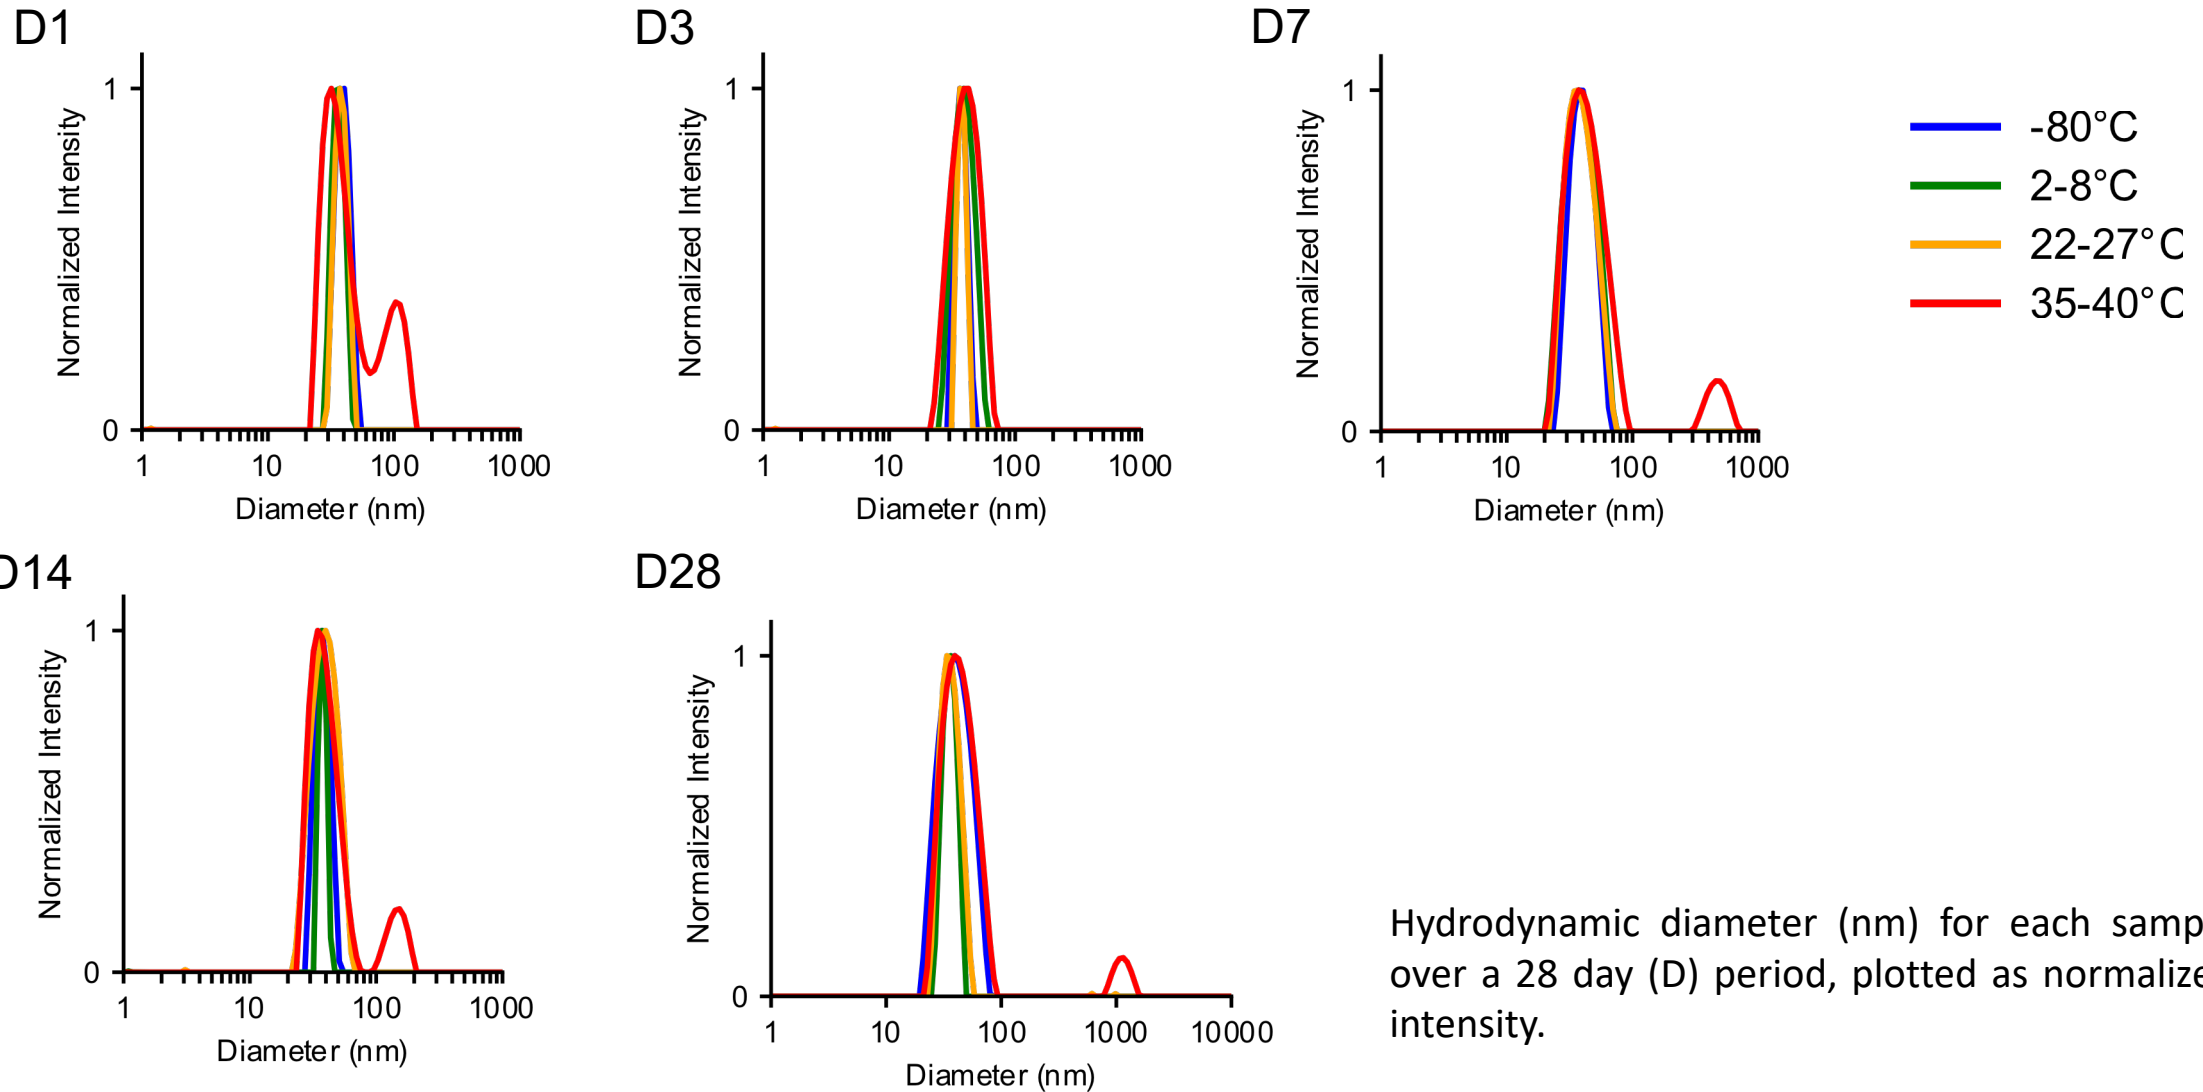

Supplement: DataSheet_4.pdf [file DataSheet_4.pdf]
