# Supplementary material for: Stabilization of the SARS-CoV-2 Spike Receptor-Binding Domain Using Deep Mutational Scanning and Structure-Based Design
Source: PubMed Central journal article supplement (PMC8276696; doi:10.3389/fimmu.2021.710263), 2021-06-29
Supplement: DataSheet_2.pdf [file DataSheet_2.pdf]

>RBD-I53-50A trimer (16-GS linker, using wild type RBD from Wuhan-Hu-1)

MGILPSPGMPALLSLVSLLSVLLMGCVAETGTRFPNITNLCPFGEVFNATRFASVYAWNRKRISNCVADY  
SVLYNSASFSTFKCYGVSPTKLNLDLCFTNVYADSFVIRGDEVQRQIAPGQTGKIADYNYKLPDDFTGCVIA  
WNSNNLDSKVGGNYNLYRLFRKSNLKPFERDISTEIQAGSTPCNGVEGFNCYFPLQSYGFQPTNGVGY  
QPYRVVVL SFELLHAPATVCGPKKSTGGSGGSGSGGSGGSGSEKAAKAEAAARKMEELFKKHKIVAVLRA  
NSVEEAIEKAVAVFAGGVHLIEITFTVPDADTVIKALSVLKEKGAIIGAGTVTSVEQARKAVESGAEFIV  
SPHLDEEISQFAKEKGVFYMPGVMPTTELVKAMKLGHTILKLFPGEVVGPQFVKAMKGPFPNVK FVPTGG  
VNLDNVAEWFKAGVLAVGVGSALVKGTPDEVREKAKAFVEKIRGATEGGSHHHHHHHH

>Rpk1-I53-50A trimer

MGILPSPGMPALLSLVSLLSVLLMGCVAETGTRFPNITNLCPFGEVFNATRFASVYAWNRKRISNCVADW  
SVLYNSASFSTFKCYGVSPTKLNLDLCFTNVYADSFVIRGDEVQRQIAPGQTGKIADYNYKLPDDFTGCVIA  
WNSNNLDSKVGGNYNLYRLFRKSNLKPFERDISTEIQAGSTPCNGVEGFNCYFPLQSYGFQPTNGVGY  
QPYRVVVL SFELLHAPATVCGPKKSTGGSGGSGSGGSGGSGSEKAAKAEAAARKMEELFKKHKIVAVLRA  
NSVEEAIEKAVAVFAGGVHLIEITFTVPDADTVIKALSVLKEKGAIIGAGTVTSVEQARKAVESGAEFIV  
SPHLDEEISQFAKEKGVFYMPGVMPTTELVKAMKLGHTILKLFPGEVVGPQFVKAMKGPFPNVK FVPTGG  
VNLDNVAEWFKAGVLAVGVGSALVKGTPDEVREKAKAFVEKIRGATEGGSHHHHHHHH

>Rpk2-I53-50A trimer

MGILPSPGMPALLSLVSLLSVLLMGCVAETGTRFPNITNLCPLGEVFNATRFASVYAWNRKRISNCVADW  
SVLYNSASFSTFKCYGVSPTKLNLDLCFTNVYADSFVIRGDEVQRQIAPGQTGKIADYNYKLPDDFTGCVIA  
WNSNNLDSKVGGNYNLYRLFRKSNLKPFERDISTEIQAGSTPCNGVEGFNCYFPLQSYGFQPTNGVGY  
QPYRVVVL SFELLHAPATVCGPKKSTGGSGGSGSGGSGGSGSEKAAKAEAAARKMEELFKKHKIVAVLRA  
NSVEEAIEKAVAVFAGGVHLIEITFTVPDADTVIKALSVLKEKGAIIGAGTVTSVEQARKAVESGAEFIV  
SPHLDEEISQFAKEKGVFYMPGVMPTTELVKAMKLGHTILKLFPGEVVGPQFVKAMKGPFPNVK FVPTGG  
VNLDNVAEWFKAGVLAVGVGSALVKGTPDEVREKAKAFVEKIRGATEGGSHHHHHHHH

>Rpk3-I53-50A trimer

MGILPSPGMPALLSLVSLLSVLLMGCVAETGTRFPNITNLCPFGEVFNATRFASVYAWNRKRISNCVADW  
SVLYNSASFSTFKCYGVSPTKLNLDLCFTNVYADSFVIRGDEVQRQIAPGQTGKIADYNYKLPDDFTGCVIA  
WNSNNLDSKVGGNYNLYRLFRKSNLKPFERDISTEIQAGSTPCNGVEGFNCYFPLQSYGFQPTNGVGY  
QPYRVVMSFELLHAPATVCGPKKSTGGSGGSGSGGSGGSGSEKAAKAEAAARKMEELFKKHKIVAVLRA  
NSVEEAIEKAVAVFAGGVHLIEITFTVPDADTVIKALSVLKEKGAIIGAGTVTSVEQARKAVESGAEFIV  
SPHLDEEISQFAKEKGVFYMPGVMPTTELVKAMKLGHTILKLFPGEVVGPQFVKAMKGPFPNVK FVPTGG  
VNLDNVAEWFKAGVLAVGVGSALVKGTPDEVREKAKAFVEKIRGATEGGSHHHHHHHH

>Rpk4-I53-50A trimer

MGILPSPGMPALLSLVSLLSVLLMGCVAETGTRFPNITNLCPFGEVFNATRFASVYAWNRKRISNCVADY  
SVLYNSASFSTFKCYGVSPTKLNLDLCWTNVYADSFVIRGDEVQRQIAPGQTGKIADYNYKL PDDFTGCVIA  
WNSNNLDSKVGGNYNLYRLFRKSNLKPFERDISTEIQAGSTPCNGVEGFNCYFPLQSYGFQPTNGVGY  
QPYRVVLSFELLHAPATVCGPKKSTGGSGGSGSGGSGGSGSEKAAKAAEEAARKMEELFKKHKIVAVLRA  
NSVEEAIEKAVAVFAGGVHLIEITFTVPDADTVIKALSVLKEKGAIIGAGTVTSVEQARKAVESGAEFIV  
SPHLDEEISQFAKEKGVFYMPGVMPTTELVKAMKLGHTILKLFPGEVVGPQFVKAMKGPFPNVK FVPTGG  
VNLDNVAEWFKAGVLAVGVGSALVKGTPDEVREKAKAFVEKIRGATEGGSHHHHHHHH

>Rpk5-I53-50A trimer

MGILPSPGMPALLSLVSLLSVLLMGCVAETGTRFPNITNLCPFGEVFNATRFASVYAWNRKRISNCVADW  
SVLYNSASFSTFKCYGVSPTKLNLDLCWTNVYADSFVIRGDEVQRQIAPGQTGKIADYNYKL PDDFTGCVIA  
WNSNNLDSKVGGNYNLYRLFRKSNLKPFERDISTEIQAGSTPCNGVEGFNCYFPLQSYGFQPTNGVGY  
QPYRVVLSFELLHAPATVCGPKKSTGGSGGSGSGGSGGSGSEKAAKAAEEAARKMEELFKKHKIVAVLRA  
NSVEEAIEKAVAVFAGGVHLIEITFTVPDADTVIKALSVLKEKGAIIGAGTVTSVEQARKAVESGAEFIV  
SPHLDEEISQFAKEKGVFYMPGVMPTTELVKAMKLGHTILKLFPGEVVGPQFVKAMKGPFPNVK FVPTGG  
VNLDNVAEWFKAGVLAVGVGSALVKGTPDEVREKAKAFVEKIRGATEGGSHHHHHHHH

>Rpk6-I53-50A trimer

MGILPSPGMPALLSLVSLLSVLLMGCVAETGTRFPNITNLCPMGEVFNATRFASVYAWNRKRISNCVLD F  
SVLYNSASFSTVKCYGVSPTKLNLDLCFTNVYADSFVIRGDEVQRQIAPGQTGKIADYNYKL PDDFTGCVIA  
WNSNNLDSKVGGNYNLYRLFRKSNLKPFERDISTEIQAGSTPCNGVEGFNCYFPLQSYGFQPTNGVGY  
QPYRVVLSFELLHAPATVCGPKKSTGGSGGSGSGGSGGSGSEKAAKAAEEAARKMEELFKKHKIVAVLRA  
NSVEEAIEKAVAVFAGGVHLIEITFTVPDADTVIKALSVLKEKGAIIGAGTVTSVEQARKAVESGAEFIV  
SPHLDEEISQFAKEKGVFYMPGVMPTTELVKAMKLGHTILKLFPGEVVGPQFVKAMKGPFPNVK FVPTGG  
VNLDNVAEWFKAGVLAVGVGSALVKGTPDEVREKAKAFVEKIRGATEGGSHHHHHHHH

>Rpk7-I53-50A trimer

MGILPSPGMPALLSLVSLLSVLLMGCVAETGTRFPNITNLCPFGEVFNATRFASVYAWNRKRISNCVAD F  
SVLYNSASFSTFKCYGVSPTKLNLDLCWTNVYADSFVIRGDEVQRQIAPGQTGKIADYNYKL PDDFTGCVIA  
WNSNNLDSKVGGNYNLYRLFRKSNLKPFERDISTEIQAGSTPCNGVEGFNCYFPLQSYGFQPTNGVGY  
QPYRVVLSFELLHAPATVCGPKKSTGGSGGSGSGGSGGSGSEKAAKAAEEAARKMEELFKKHKIVAVLRA  
NSVEEAIEKAVAVFAGGVHLIEITFTVPDADTVIKALSVLKEKGAIIGAGTVTSVEQARKAVESGAEFIV  
SPHLDEEISQFAKEKGVFYMPGVMPTTELVKAMKLGHTILKLFPGEVVGPQFVKAMKGPFPNVK FVPTGG  
VNLDNVAEWFKAGVLAVGVGSALVKGTPDEVREKAKAFVEKIRGATEGGSHHHHHHHH

>Rpk8-I53-50A trimer

MGILPSPGMPALLSLVSLLSVLLMGCVAETGTRFPNITNLCPFGEVFNATRFASVYAWNRKRISNCVAD F  
SVLYNSASFSTFKCYGVSPTKLNLDLCFTNIYADSFVIRGDEVQRQIAPGQTGKIADYNYKL PDDFTGCVIA

WNSNNLDSKVGGNYNLYRLFRKSNLKPFERDISTEIQAGSTPCNGVEGFNCYFPLQSYGFQPTNGVGY  
QPYRVVLSFELLHAPATVCGPKKSTGGSGGSGSGGSGGSGSEKAAKAEAAARKMEELFKKHKIVAVLRA  
NSVEEAIEKAVAVFAGGVHLIEITFTVPDADTVIKALSVLKEKGAIIGAGTVTSVEQARKAVESGAEFIV  
SPHLDEEISQFAKEKGVFYMPGVMPTTELVKAMKLGHTILKLPGEVVGPPQFVKAMKGPFPNVKVFVPTGG  
VNLDNVAEWFKAGVLAVGVGSALVKGTPDEVREKAKAFVEKIRGATEGGSHHHHHHHH

>Rpk9-I53-50A trimer

MGILPSPGMPALLSLVSLLSVLLMGCVAETGTRFPNITNLCPFGEVFNATRFASVYAWNRKRISNCVADF  
SVLYNSASFSTFKCYGVSPTKLNLDLCTNVIYADSFVIRGDEVQRQIAPGQTGKIADYNYKL PDDFTGCVIA  
WNSNNLDSKVGGNYNLYRLFRKSNLKPFERDISTEIQAGSTPCNGVEGFNCYFPLQSYGFQPTNGVGY  
QPYRVVLSFELLHAPATVCGPKKSTGGSGGSGSGGSGGSGSEKAAKAEAAARKMEELFKKHKIVAVLRA  
NSVEEAIEKAVAVFAGGVHLIEITFTVPDADTVIKALSVLKEKGAIIGAGTVTSVEQARKAVESGAEFIV  
SPHLDEEISQFAKEKGVFYMPGVMPTTELVKAMKLGHTILKLPGEVVGPPQFVKAMKGPFPNVKVFVPTGG  
VNLDNVAEWFKAGVLAVGVGSALVKGTPDEVREKAKAFVEKIRGATEGGSHHHHHHHH

>Rpk10-I53-50A trimer

MGILPSPGMPALLSLVSLLSVLLMGCVAETGTRFPNITNLCPFGEVFNATRFASVYAWNRKRISNCVADW  
SVLYNSASFSTFKCYGVSPTKLNLDLCTNVIYADSFVIRGDEVQRQIAPGQTGKIADYNYKL PDDFTGCVIA  
WNSNNLDSKVGGNYNLYRLFRKSNLKPFERDISTEIQAGSTPCNGVEGFNCYFPLQSYGFQPTNGVGY  
QPYRVVVISLELLHAPATVCGPKKSTGGSGGSGSGGSGGSGSEKAAKAEAAARKMEELFKKHKIVAVLRA  
NSVEEAIEKAVAVFAGGVHLIEITFTVPDADTVIKALSVLKEKGAIIGAGTVTSVEQARKAVESGAEFIV  
SPHLDEEISQFAKEKGVFYMPGVMPTTELVKAMKLGHTILKLPGEVVGPPQFVKAMKGPFPNVKVFVPTGG  
VNLDNVAEWFKAGVLAVGVGSALVKGTPDEVREKAKAFVEKIRGATEGGSHHHHHHHH

>Rpk11-I53-50A trimer

MGILPSPGMPALLSLVSLLSVLLMGCVAETGTRFPNITNLCPGGEVFNATRFASVYAWNRKRISNCVLDM  
SVLYNSASFSTFKCYGVSPTKLNLDLCTNVIYADSFVIRGDEVQRQIAPGQTGKIADYNYKL PDDFTGCVIA  
WNSNNLDSKVGGNYNLYRLFRKSNLKPFERDISTEIQAGSTPCNGVEGFNCYFPLQSYGFQPTNGVGY  
QPYRVVLSFELLHAPATVCGPKKSTGGSGGSGSGGSGGSGSEKAAKAEAAARKMEELFKKHKIVAVLRA  
NSVEEAIEKAVAVFAGGVHLIEITFTVPDADTVIKALSVLKEKGAIIGAGTVTSVEQARKAVESGAEFIV  
SPHLDEEISQFAKEKGVFYMPGVMPTTELVKAMKLGHTILKLPGEVVGPPQFVKAMKGPFPNVKVFVPTGG  
VNLDNVAEWFKAGVLAVGVGSALVKGTPDEVREKAKAFVEKIRGATEGGSHHHHHHHH

>Rpk12-I53-50A trimer

MGILPSPGMPALLSLVSLLSVLLMGCVAETGTRFPNITNLCPFGEVFNATRFASVYAWNRKRFSNCVADW  
SVLYNSASFSTFKCYGVSPTKLNLDLCTNVIYADSFVIRGDEVQRQIAPGQTGKIADYNYKL PDDFTGCVIA  
WNSNNLDSKVGGNYNLYRLFRKSNLKPFERDISTEIQAGSTPCNGVEGFNCYFPLQSYGFQPTNGVGY  
QPYRVVLSFELLHAPATVCGPKKSTGGSGGSGSGGSGGSGSEKAAKAEAAARKMEELFKKHKIVAVLRA

NSVEEAIEKAVAVFAGGVHLIEITFTVPDADTVIKALSVLKEKGAIIGAGTVTSVEQARKAVESGAEFIV  
SPHLDEEISQFAKEKGVFYMPGVMPTTELVKAMKLGHTILKLFPGEVVGPQFVKAMKGPFPNVKVFVPTGG  
VNLDNVAEWFKAGVLAVGVGSALVKGTPDEVREKAKAFVEKIRGATEGGSHHHHHHHH

>Rpk13-I53-50A trimer

MGILPSPGMPALLSLVSLLSVLLMGCVAETGTRFPNITNLCPLGEVFNATRFASVYAWNRKRFSNCVADW  
SVLYNSASFSTFKCYGVSPTKLNLCFTNVYADSFVIRGDEVQRQIAPGQTGKIADYNYKLPDDFTGCVIA  
WNSNNLDSKVGGNYNLYRLFRKSNLKPFERDISTEIQAGSTPCNGVEGFNCYFPLQSYGFQPTNGVGY  
QPYRVVVLSFELLHAPATVCGPKKSTGGSGGSGSGGSGGSGSEKAAKAAEEAARKMEELFKKHKIVAVLRA  
NSVEEAIEKAVAVFAGGVHLIEITFTVPDADTVIKALSVLKEKGAIIGAGTVTSVEQARKAVESGAEFIV  
SPHLDEEISQFAKEKGVFYMPGVMPTTELVKAMKLGHTILKLFPGEVVGPQFVKAMKGPFPNVKVFVPTGG  
VNLDNVAEWFKAGVLAVGVGSALVKGTPDEVREKAKAFVEKIRGATEGGSHHHHHHHH

>Rpk14-I53-50A trimer

MGILPSPGMPALLSLVSLLSVLLMGCVAETGTRFPNITNLCPFGEVFNATRFASVYAWNRKRFSNCVADW  
SVLYNSASFSTFKCYGVSPTKLNLCFTNVYADSFVIRGDEVQRQIAPGQTGKIADYNYKLPDDFTGCVIA  
WNSNNLDSKVGGNYNLYRLFRKSNLKPFERDISTEIQAGSTPCNGVEGFNCYFPLQSYGFQPTNGVGY  
QPYRVVVMSFELLHAPATVCGPKKSTGGSGGSGSGGSGGSGSEKAAKAAEEAARKMEELFKKHKIVAVLRA  
NSVEEAIEKAVAVFAGGVHLIEITFTVPDADTVIKALSVLKEKGAIIGAGTVTSVEQARKAVESGAEFIV  
SPHLDEEISQFAKEKGVFYMPGVMPTTELVKAMKLGHTILKLFPGEVVGPQFVKAMKGPFPNVKVFVPTGG  
VNLDNVAEWFKAGVLAVGVGSALVKGTPDEVREKAKAFVEKIRGATEGGSHHHHHHHH

>Rpk15-I53-50A trimer

MGILPSPGMPALLSLVSLLSVLLMGCVAETGTRFPNITNLCPFGEVFNATRFASVYAWNRKRFSNCVADF  
SVLYNSASFSTFKCYGVSPTKLNLCFTNIYADSFVIRGDEVQRQIAPGQTGKIADYNYKLPDDFTGCVIA  
WNSNNLDSKVGGNYNLYRLFRKSNLKPFERDISTEIQAGSTPCNGVEGFNCYFPLQSYGFQPTNGVGY  
QPYRVVVLSFELLHAPATVCGPKKSTGGSGGSGSGGSGGSGSEKAAKAAEEAARKMEELFKKHKIVAVLRA  
NSVEEAIEKAVAVFAGGVHLIEITFTVPDADTVIKALSVLKEKGAIIGAGTVTSVEQARKAVESGAEFIV  
SPHLDEEISQFAKEKGVFYMPGVMPTTELVKAMKLGHTILKLFPGEVVGPQFVKAMKGPFPNVKVFVPTGG  
VNLDNVAEWFKAGVLAVGVGSALVKGTPDEVREKAKAFVEKIRGATEGGSHHHHHHHH

>Rpk16-I53-50A trimer

MGILPSPGMPALLSLVSLLSVLLMGCVAETGTRFPNITNLCPFGEVFNATRFASVYAWNRKRFSNCVADW  
SVLYNSASFSTFKCYGVSPTKLNLCWTVYADSFVIRGDEVQRQIAPGQTGKIADYNYKLPDDFTGCVIA  
WNSNNLDSKVGGNYNLYRLFRKSNLKPFERDISTEIQAGSTPCNGVEGFNCYFPLQSYGFQPTNGVGY  
QPYRVVVLSFELLHAPATVCGPKKSTGGSGGSGSGGSGGSGSEKAAKAAEEAARKMEELFKKHKIVAVLRA  
NSVEEAIEKAVAVFAGGVHLIEITFTVPDADTVIKALSVLKEKGAIIGAGTVTSVEQARKAVESGAEFIV

SPHLDEEISQFAKEKGVFYMPGVMTPTELVKAMKLGHTILKLFPGEVVGPQFVKAMKGPFPNVK FVPTGG  
VNLDNVAEWFKAGVLAVGVGSALVKGTPDEVREKAKAFVEKIRGATEGGSHHHHHHHH

>Rpk17-I53-50A trimer

MGILPSPGMPALLSLVSLLSVLLMGCVAETGTRFPNITNLCPFGEVFNATRFASVYAWNRKRFSNCVADF  
SVLYNSASFSTFKCYGVSPTKLNLDLCWTNIYADSFVIRGDEVQRQIAPGQTGKIADYNYKLPDDFTGCVIA  
WNSNNLDSKVGGNYNLYRLFRKSNLKPFERDISTEIQAGSTPCNGVEGFNCYFPLQSYGFQPTNGVGY  
QPYRVVLSFELLHAPATVCGPKKSTGGSGGSGGSGGSGGSEKAAKAAEEAARKMEELFKKHKIVAVLRA  
NSVEEAIEKAVAVFAGGVHLIEITFTVPDADTVIKALSVLKEKGAIIGAGTVTSVEQARKAVESGAEFIV  
SPHLDEEISQFAKEKGVFYMPGVMTPTELVKAMKLGHTILKLFPGEVVGPQFVKAMKGPFPNVK FVPTGG  
VNLDNVAEWFKAGVLAVGVGSALVKGTPDEVREKAKAFVEKIRGATEGGSHHHHHHHH

>RBD monomer (with Avi and hexa-histidine tags)

MGILPSPGMPALLSLVSLLSVLLMGCVAETGTRFPNITNLCPFGEVFNATRFASVYAWNRKRISNCVADY  
SVLYNSASFSTFKCYGVSPTKLNLDLCFTNVYADSFVIRGDEVQRQIAPGQTGKIADYNYKLPDDFTGCVIA  
WNSNNLDSKVGGNYNLYRLFRKSNLKPFERDISTEIQAGSTPCNGVEGFNCYFPLQSYGFQPTNGVGY  
QPYRVVLSFELLHAPATVCGPKKSTGLNDIFEAQKIEWHEHHHHHHHHH

>Rpk4 monomer (with Avi and hexa-histidine tags)

MGILPSPGMPALLSLVSLLSVLLMGCVAETGTRFPNITNLCPFGEVFNATRFASVYAWNRKRISNCVADY  
SVLYNSASFSTFKCYGVSPTKLNLDLCWTNVYADSFVIRGDEVQRQIAPGQTGKIADYNYKLPDDFTGCVIA  
WNSNNLDSKVGGNYNLYRLFRKSNLKPFERDISTEIQAGSTPCNGVEGFNCYFPLQSYGFQPTNGVGY  
QPYRVVLSFELLHAPATVCGPKKSTGLNDIFEAQKIEWHEHHHHHHHHH

>Rpk9 monomer (with Avi and hexa-histidine tags)

MGILPSPGMPALLSLVSLLSVLLMGCVAETGTRFPNITNLCPFGEVFNATRFASVYAWNRKRISNCVADF  
SVLYNSASFSTFKCYGVSPTKLNLDLCWTNIYADSFVIRGDEVQRQIAPGQTGKIADYNYKLPDDFTGCVIA  
WNSNNLDSKVGGNYNLYRLFRKSNLKPFERDISTEIQAGSTPCNGVEGFNCYFPLQSYGFQPTNGVGY  
QPYRVVLSFELLHAPATVCGPKKSTGLNDIFEAQKIEWHEHHHHHHHHH

>I53-50B.4PT1 pentamer

MNQHSHKDHETVRIAVVRARWHAIEIVDACVSAFEAMRDIGGDRFAVDVFDVPGAYEIP LHARTLAETGR  
YGAVLGTAFVVNGGIYRHEFVASAVINGMMNVQLNTGVPVLSAVLTPHNYDKSKAHTLLFLALFAVKGME  
AARACVEILAAREKIAAGSLEHHHHHHH

>20BX pentamer

MNQSHKDYETVRIAVVRARWHADIVDQCVSFAFEAMADIGGDRFAVDVFDVPGAYEIPLHARTLAETGR  
YGAVLGTAFVVNGGIYRHEFVASAVIDGMMNVQLSTGVPVLSAVLTPHNYHDSA EHRFFFEHFTVKGKE  
AARACVEILAAREKIAAGSLEHHHHHH

>Hexapro-foldon, used for immunizations (Wuhan-Hu-1)

MFVFLVLLPLVSSQCVNL TTRTQLPPAYTNSFTRGVYYPDKVFRSSVLHSTQDLFLPFFSNVTWFHAIHV  
SGTNGTKRFDNPVLPFNDGVYFASTEKSNIIRGWIFGTTLD SKTQSLLIVNNATNVVIKVCEFQFCNDPF  
LGVYYHKNNKSWMESEFRVYSSANNCTFEYVSQPFLMDLEGKQGNFKNLREFVFKNIDGYFKIYSKHTPI  
NLVRDL PQGFSALEPLVDLPIGINITRFQTL LALHRSYLT PGDSSSGWTAGAAAYVGYLQPRTFLLKYN  
ENGTITDAVDCALDPLSETKCTLSFTVEKGIYQTSNFRVQPTESIVRFPNITNLCPFGEVFNATRFASV  
YAWNKRISNCVADYSVLYNSASFSTFKCYGVSPTKLN DLCTNVYADSFVIRGDEV RQIAPGQTGKIAD  
YNYKLPDDFTGCVIAWNSNNLDSKVGNYNYLYR LFRKSNLKPFERDISTEIQAGSTPCNGVEGFNCYF  
PLQSYGFQPTNGVGYQP YRVVLSFELLHAPATVCGPKKSTNLVKNKCVNFNFNGLTGTGVLTESNKKFL  
PFQQFGRDIADTTDAVRDPQTLEILDITPCSFGGVS VITPGTNTSNQVAVLYQDVNCTEVPVAIHADQLT  
PTWRVYSTGSNVFQTRAGCLIGA EHVNNSYECDIPIGAGICASYQTQTNSPGSASSVASQSIIAYTMSLG  
AENSVAYSNN SIAIPTNFTISVTTEILPVSM TKTSDCTMYICGDSTEC SNLLLQYGSFCTQLNRAL TGI  
AVEQDKNTQEVFAQVKQIYKTPPIKDFGGFNFSQILPDP SKPSKRSP IEDLLFNKVT LADAGFIKQYGDC  
LGDIAARDL ICAQKFNGLTVLPPLL TDEMIAQYTSALLAGTITSGWTFGAGPALQIPFPMQMAYRFNGIG  
VTQNVLYENQKLIANQFN SAIGKIQDLSSTPSALGKLQDVVNQNAQALNTLVKQLSSNFGA ISSVLNDI  
LSRLDPPEAEVQIDRLITGRLQSLQTYVTQQLIRAAEIRASANLAATKMSECVLGQSKRVDFCGKGYHLM  
SFPQSAPHGVVFLHVTYVPAQEKNF TAPAICH DGKAHFPREGV FVSNGTHWFVTQRNFYEPQIITDNT  
FVSGNCDVVIGIVNNTVYDPLQPELDSFKEELDKYFKNHTSPDV DLGDISGINASVVNIQKEIDRLNEVA  
KNL NESLIDLQELGKYEQSGSYIPEAPRDGQAYVRKDG EWVLLSTFLGRSLEVL FQGP GHHHHHHHHS AW  
SHPQFEKGGGSGGGGSGGSAWSHPQFEK

>Hexapro-foldon, used for expression and stability comparisons with  
Rpk9-Hexapro-foldon (Wuhan-Hu-1)

MARAWIFFLLCLAGRALAQC VNLTTRTQLPPAYTNSFTRGVYYPDKVFRSSVLHSTQDLFLPFFSNVTWF  
HAIHVSGTNGTKRFDNPVLPFNDGVYFASTEKSNIIRGWIFGTTLD SKTQSLLIVNNATNVVIKVCEFQF  
CNDPFLGVYYHKNNKSWMESEFRVYSSANNCTFEYVSQPFLMDLEGKQGNFKNLREFVFKNIDGYFKIYS  
KHTPINLVRDL PQGFSALEPLVDLPIGINITRFQTL LALHRSYLT PGDSSSGWTAGAAAYVGYLQPRTF  
LLKYNENGTITDAVDCALDPLSETKCTLSFTVEKGIYQTSNFRVQPTESIVRFPNITNLCPFGEVFNAT  
RFASVYAWNKRISNCVADYSVLYNSASFSTFKCYGVSPTKLN DLCTNVYADSFVIRGDEV RQIAPGQT  
GKIADYNYKLPDDFTGCVIAWNSNNLDSKVGNYNYLYR LFRKSNLKPFERDISTEIQAGSTPCNGVEG  
FNCYFPLQSYGFQPTNGVGYQP YRVVLSFELLHAPATVCGPKKSTNLVKNKCVNFNFNGLTGTGVLTES  
NKKFLPFQQFGRDIADTTDAVRDPQTLEILDITPCSFGGVS VITPGTNTSNQVAVLYQDVNCTEVPVAIH  
ADQLTPTWRVYSTGSNVFQTRAGCLIGA EHVNNSYECDIPIGAGICASYQTQTNSPGSASSVASQSIIAY  
TMSLGAENSVAYSNN SIAIPTNFTISVTTEILPVSM TKTSDCTMYICGDSTEC SNLLLQYGSFCTQLNR

ALTGIAVEQDKNTQEVEFAQVKQIYKTPPIKDFGGFNFSQILPDPSKPSKRSPIEDLLFNKVTLADAGFIK  
QYGDCLGDIAARDLICAQKFNGLTVLPPLLTDEMQYTSALLAGTITSGWTFGAGPALQIPFPMQMAYR  
FNGIGVTQNVLYENQKLIANQFNFAIGKIQDSLSTPSALGKLQDVVNQNAQALNTLVKQLSSNFGAISS  
VLNDILSRDPPEAEVQIDRLITGRLQSLQTYVTQQLIRAAEIRASANLAATKMSECVLGQSKRVDFCGK  
GYHLMSFPQSAPHGVVFLHVTYVPAQEKNFTTAPAICHGDKAHFPREGVFVSNGTHWFVTQRNFYEPQII  
TTDNTEFVSGNCDVVIGIVNNTVYDPLQPELDSFKEELDKYFKNHTSPDVLGDISGINASVVNIQKEIDR  
LNEVAKNLNESLIDLQELGKYEQSGYIPEAPRDGQAYVRKDGWVLLSTFLGRSLEVLFGQPGHHHHHH  
HH

>Rpk9-Hexapro-foldon (Wuhan-Hu-1)

MARAWIFFLLCLAGRALAQCENLTTTRTQLPPAYTNSFTRGVYYPDKVFRSSVLHSTQDLFLPFFSNVTFW  
HAIHVSNGTNGTKRFDNPVLPFNDGVYFASTEKSNIRGWIFGTTLDSTQSLIIVNNATNVVIKVFCEQF  
CNDPFLGVYHKNKSWMESEFRVYSSANNCTFEYVSQPFLMDLEGKQGNFKNLREFVFKNIDGYFKIYS  
KHTPINLVRDLQGFSALEPLVDLPIGINITRFQTLALHRSYLTGDSGWTAGAAAYVGYLQPRTF  
LLKYNENGTITDAVDCALDPLSETKCTLSFTVEKGIYQTSNFRVQPTESIVRFPNITNLCPFGEVFNAT  
RFASVYAWNRKRISNCVADFSVLYNSASFSTFKCYGVSPTKLDLNCWTNIYADSFVIRGDEVQRQIAPGQT  
GKIADYNYKLPDDFTGCVIAWNSNNLDSKVGGNYNLYRLFRKSNLKPFERDISTEYQAGSTPCNGVEG  
FNCYFPLQSYGFQPTNGVGYQPYRVVLSFELLHAPATVCGPKKSTNLVKNKCVNFNGLTGTGVLTES  
NKKFLPFQFGRDIADTTDAVRDPQTEILDITPCSFGGVSVITPGTNTSNQVAVLYQDVNCTEVPVAIH  
ADQLTPTWRVYSTGSNVFQTRAGCLIGAHEVNNSECDIPIGAGICASYQTQTNSPGSASSVASQSIIAY  
TMSLGAENSVAYSNSIAIPTNFTISVTTEILPVSMTKTSVDCTMYICGDSTECNLLLQYGSFCTQLNR  
ALTGIAVEQDKNTQEVEFAQVKQIYKTPPIKDFGGFNFSQILPDPSKPSKRSPIEDLLFNKVTLADAGFIK  
QYGDCLGDIAARDLICAQKFNGLTVLPPLLTDEMQYTSALLAGTITSGWTFGAGPALQIPFPMQMAYR  
FNGIGVTQNVLYENQKLIANQFNFAIGKIQDSLSTPSALGKLQDVVNQNAQALNTLVKQLSSNFGAISS  
VLNDILSRDPPEAEVQIDRLITGRLQSLQTYVTQQLIRAAEIRASANLAATKMSECVLGQSKRVDFCGK  
GYHLMSFPQSAPHGVVFLHVTYVPAQEKNFTTAPAICHGDKAHFPREGVFVSNGTHWFVTQRNFYEPQII  
TTDNTEFVSGNCDVVIGIVNNTVYDPLQPELDSFKEELDKYFKNHTSPDVLGDISGINASVVNIQKEIDR  
LNEVAKNLNESLIDLQELGKYEQSGYIPEAPRDGQAYVRKDGWVLLSTFLGRSLEVLFGQPGHHHHHH  
HH

>hACE2-FC

MARAWIFFLLCLAGRALASTIEEQAKTFLDKFNHEAEDLFYQSSLASWNYNTNITEENVQNMNAGDKWS  
AFLKEQSTLAQMYPLQEIQNLTVKQLQALQONGSSVLSKSKRLNTILNTMSTIYSTGKVCNPDNPQE  
CLLLEPGLNEIMANSLDYNERLWAWESWRSEVGKQLRPLYEYVVLKNEMARANHYEDYGDYWRGDYEVN  
GVDGYDYSRGLIEDVEHTFEEIKPLYEHLHAYVRAKLMNAYPSYISPIGCLPAHLLGDMWGRFWTNLYS  
LTVFPGQKPNIDVTDAMVDQAWDAQRIFKEAEKFFVSVGLPNMTQGFWENSMLTDPGNVQKAVCHPTAWD  
LGKGDIFRILMCTKVMTDDFLTAHHEMGIQYDMAYAAQPFLLRNANEGFHEAVGEIMSLSAATPKHLKS  
IGLLSPDFQEDNETEINFLKQALTIIVGTLPTFTYMLEKWRWVFKGEIPKDQWMMKWWEMKREIVGVVEP

VPHDETYCDPASLFHVSNDYSFIRYYTRTLYQFQFQEALCQAAKHEGPLHKCDISNSTEAGQKLFNMLRL  
GKSEPWTLAENVVGAKNMNVRPLLNYFEPLFTWLKDQNKNSFVGWSTDWSPYADPLVPRGSGGGGDPEP  
KSCDKTHTCPPCPAPELLGGPSVFLFPPKPKDTLMISRTPEVTCVVDVSHEDPEVKFNWYVDGVEVHNA  
KTKPREEQYNSTYRVVSVLTVLHQDWLNGKEYKCKVSNKALPAPIEKTISKAKGQPREPQVYITLPPSRDE  
LTKNQVSLTCLVKGFYPSDIAVEWESNGQPENNYKTTTPVLDSDGSFFLYSKLTVDKSRWQQGNVFCFV  
MHEALHNHYTQKSLSLSPGK
